# Supplementary material for: Changes of the tropical glaciers throughout Peru between 2000 and 2016 – Mass balance and area fluctuations
Source: Copernicus journal article supplement (doi:10.5194/tc-2018-289), 2019-02-21
Supplement: Supplementary file 1 [file tc-2018-289-supplement.pdf]

## Supplement to:

# Changes of the tropical glaciers throughout Peru between 2000 and 2016 – Mass balance and area fluctuations

Seehaus Thorsten<sup>1</sup>, Malz Philipp<sup>1</sup>, Sommer Christian<sup>1</sup>, Stefan Lipp<sup>1</sup>, Alejo Cochachin<sup>2</sup>, Matthias Braun<sup>1</sup>

<sup>1</sup>Institute of Geography, Friedrich-Alexander-University Erlangen-Nuremberg, Wetterkreuz 15, 91058 Erlangen, Germany

<sup>2</sup>Unidad de Glaciología y Recursos Hídricos (UGRH), Autoridad Nacional del Agua (ANA), 02001 Huaraz, Peru

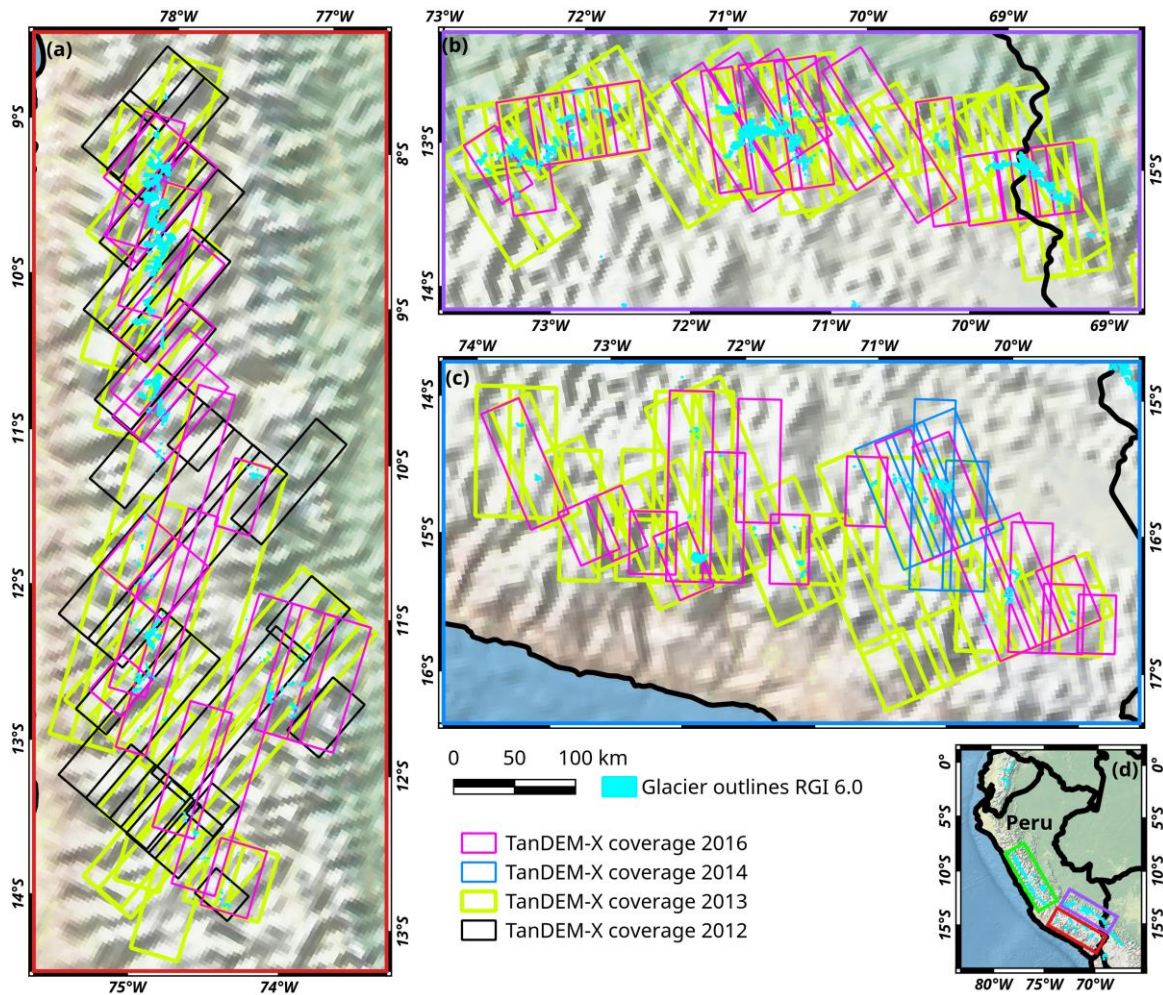

**Figure S1.** Coverage of the studied areas by TanDEM-X data. Panels (a-c): glacier subregions in Peru according to Sagredo and Lowell (2012); (a) subregion R1: northern wet outer tropics; (b) subregion R2: southern wet outer tropics; (c) subregion R3: dry outer tropics. Panel (d): overview map of Peru. Coloured rectangles indicate the locations of the subregions (same frame colours). Light blue areas: glacier coverage based on RGI 6.0. © Natural Earth

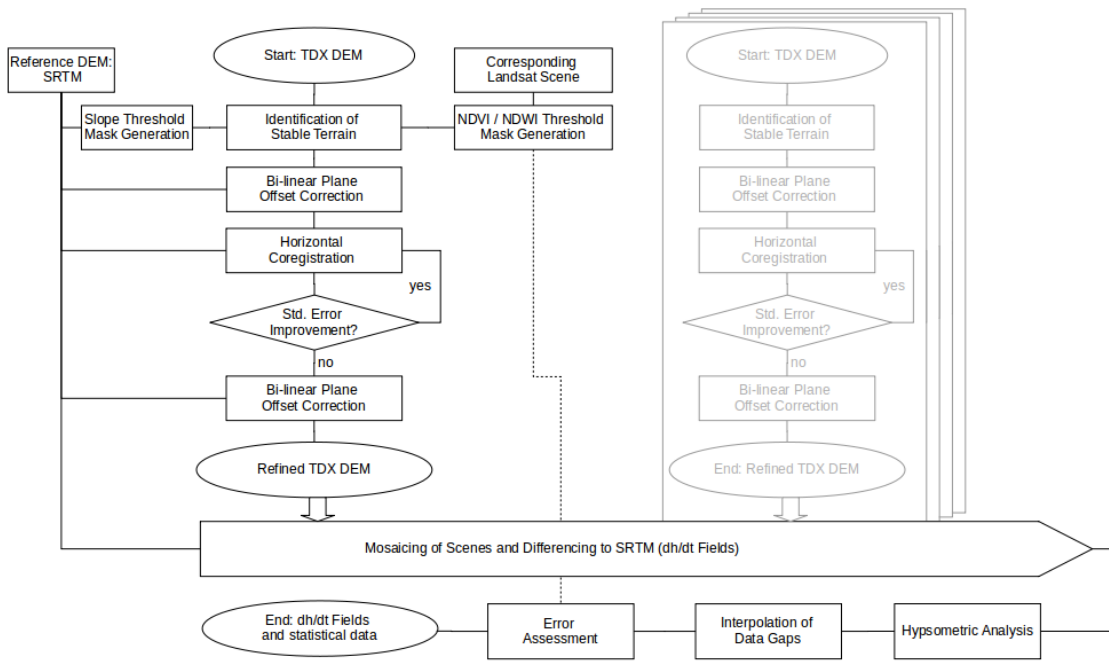

**Figure S2.** Flow chart of processing chain to perform coregistration, mosaicking, gap filling and error evaluation of TanDEM-X DEMs

## R2-2000-2016

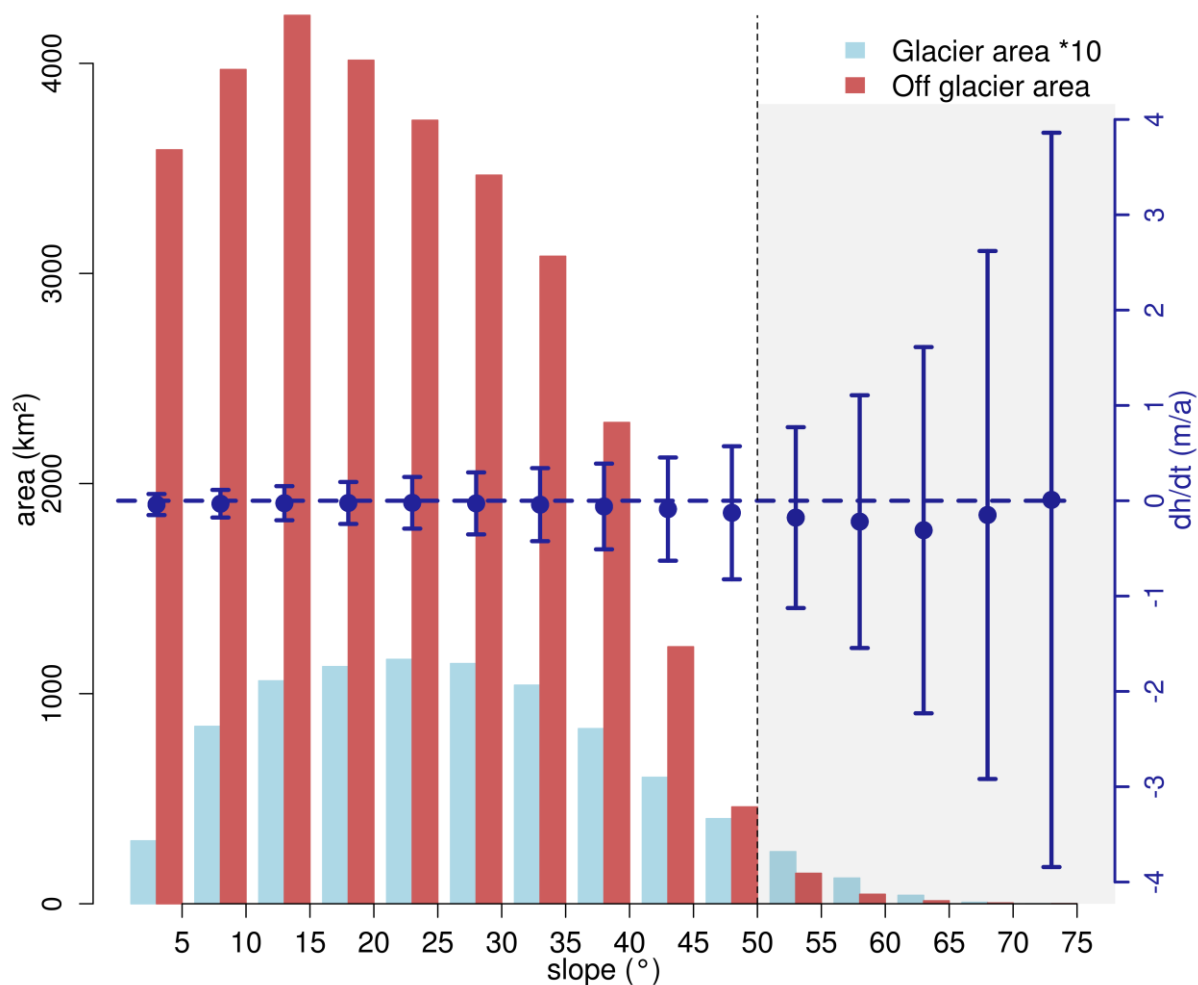

**Figure S3.** Off-(red) and on-glacier (light blue) area and off-glacier elevation change (blue dots) distributions in dependency on slope in subregion R2 for the period 2000-2016. Error bars represent NMAD of  $\Delta h/\Delta t$  values in the individual slope interval. Dotted line indicates the applied slope threshold (see Section 4.2). Glacier area measurements are based on the glacier outlines from 2000. Note: For better representation, on-glacier areas are scaled by a factor of 10.

### R3-2000-2016

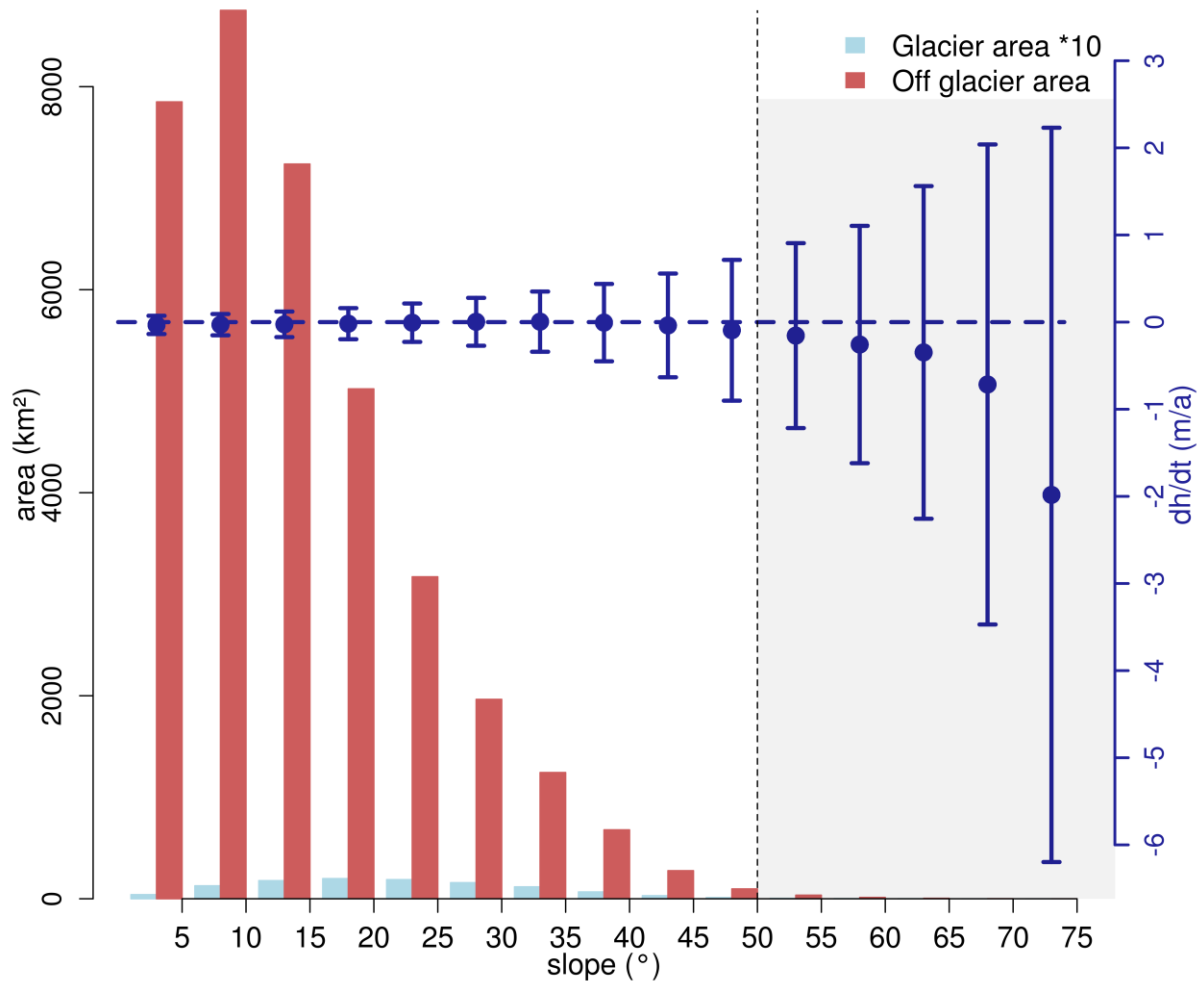

**Figure S4.** Off-(red) and on-glacier (light blue) area and off-glacier elevation change (blue dots) distributions in dependency on slope in subregion R3 for the period 2000-2016. Error bars represent NMAD of  $\Delta h/\Delta t$  values in the individual slope interval. Dotted line indicates the applied slope threshold (see Section 4.2). Glacier area measurements are based on the glacier outlines from 2000. Note: For better representation, on-glacier areas are scaled by a factor of 10.

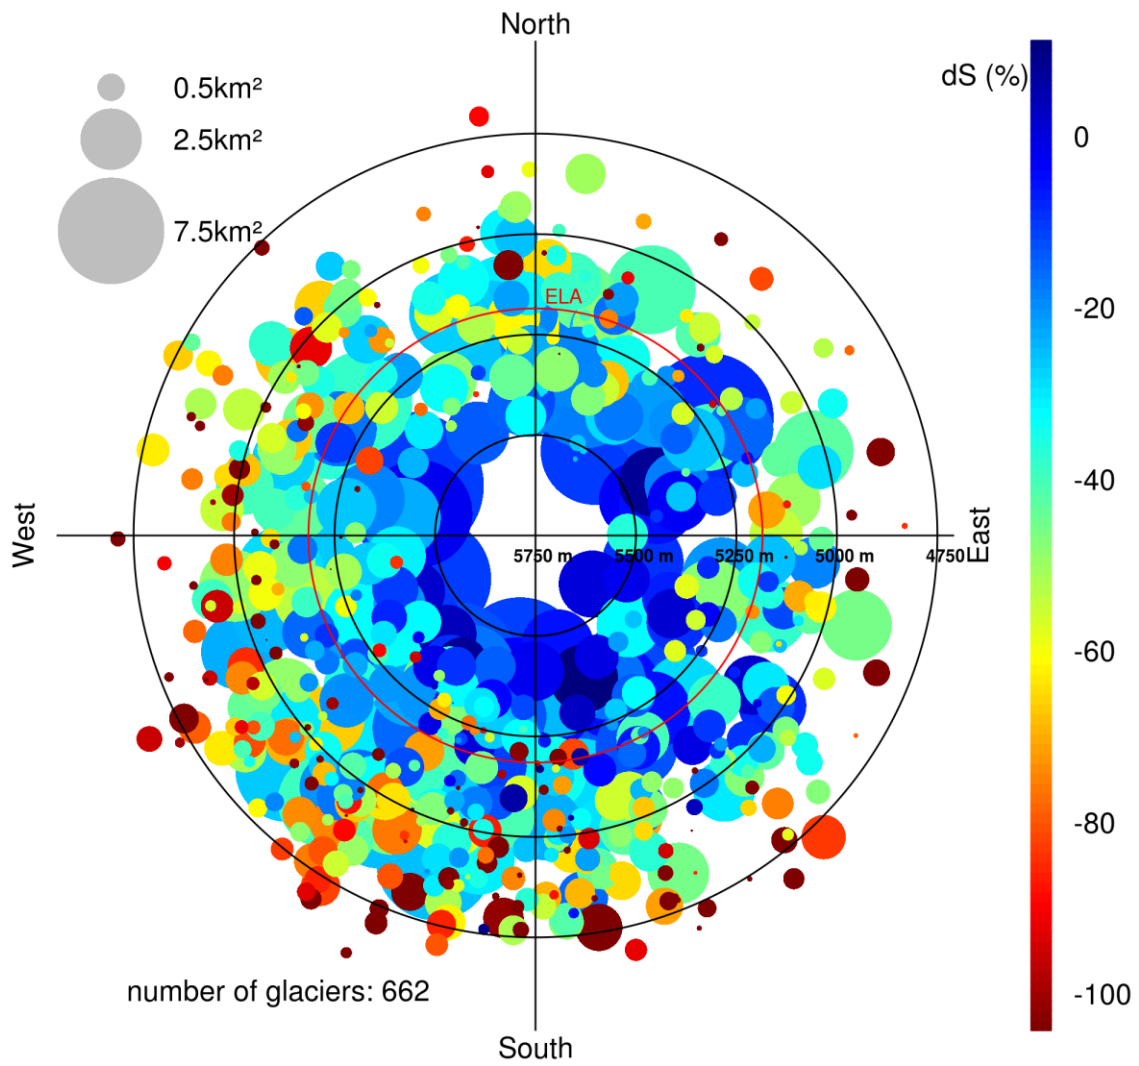

**Figure S5.** Polar plot of relative area changes (dot colour) in subregion R2 in the period 2000-2016 of individual glaciers. Dot size: glacier size in 2000; Radius: median elevation; Orientation: mean aspect. Red circle: equilibrium line altitude (ELA), see also Table S3.

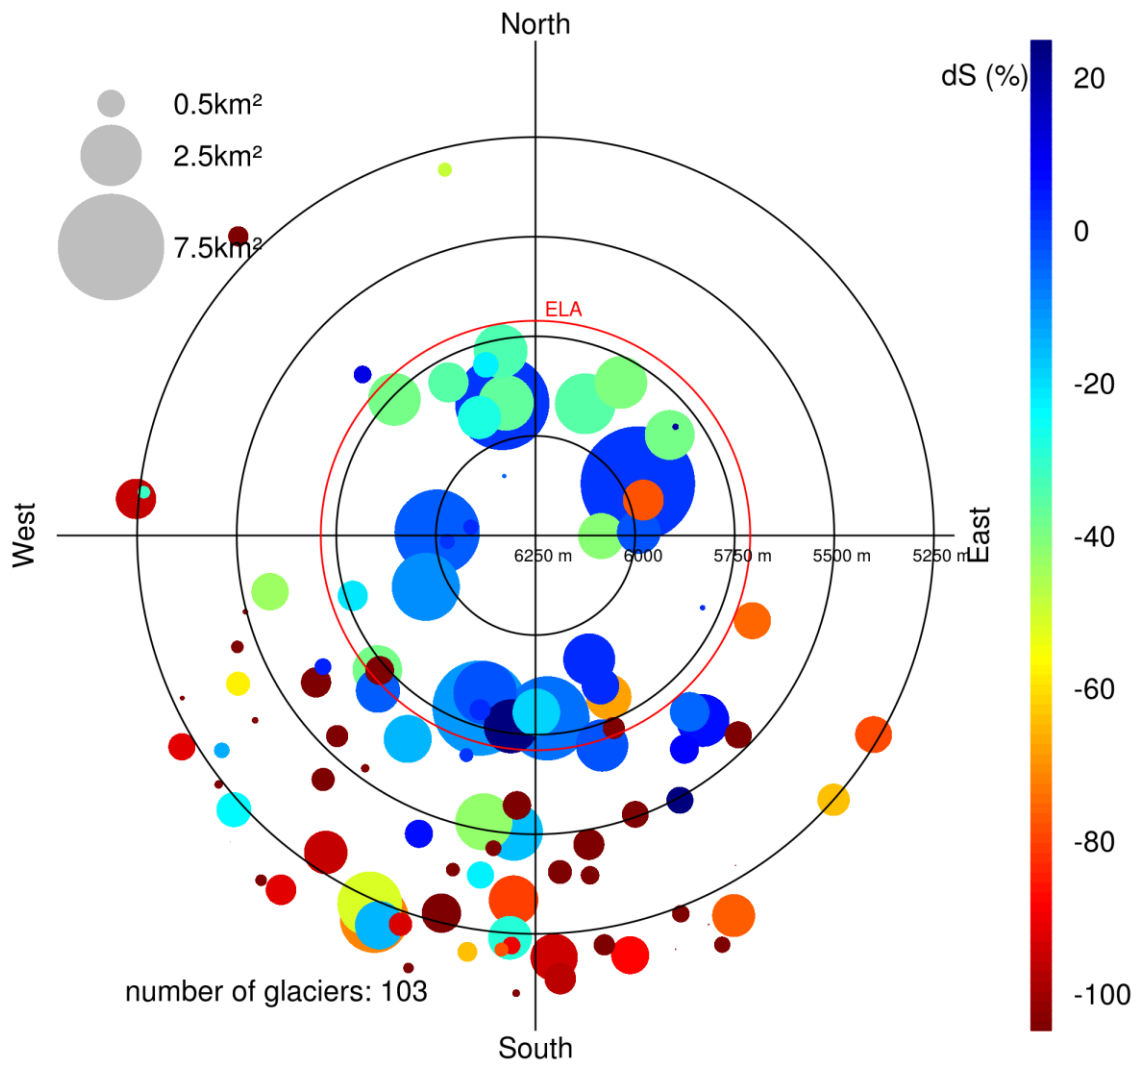

**Figure S6.** Polar plot of relative area changes (dot colour) in subregion R3 in the period 2000-2016 of individual glaciers. Dot size: glacier size in 2000; Radius: median elevation; Orientation: mean aspect. Red circle: equilibrium line altitude (ELA), see also Table S3.

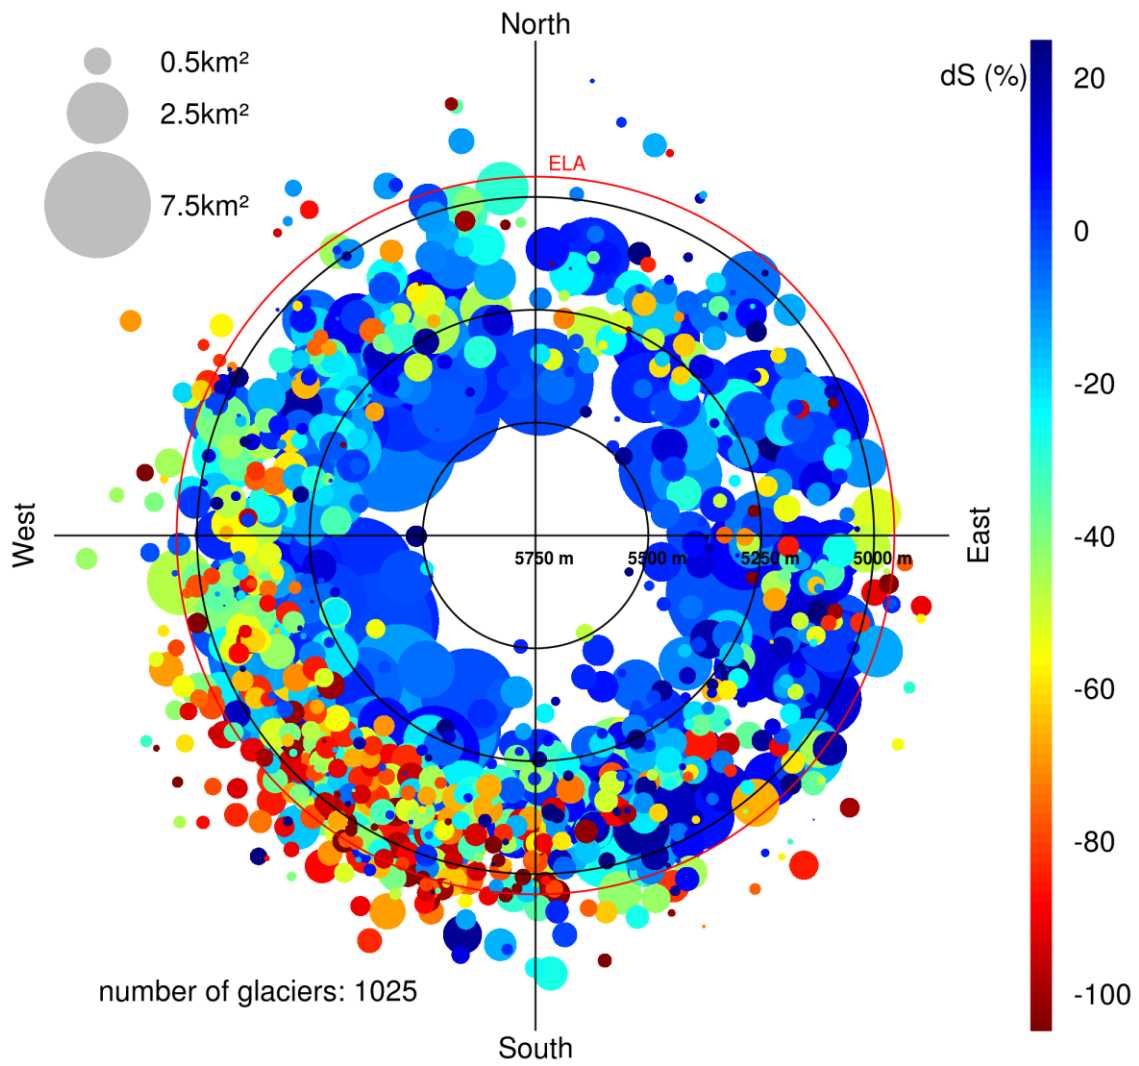

**Figure S7.** Polar plot of relative area changes (dot colour) in subregion R1 in the period 2000-2013 of individual glaciers. Dot size: glacier size in 2000; Radius: median elevation; Orientation: mean aspect. Red circle: equilibrium line altitude (ELA), see also Table S3.

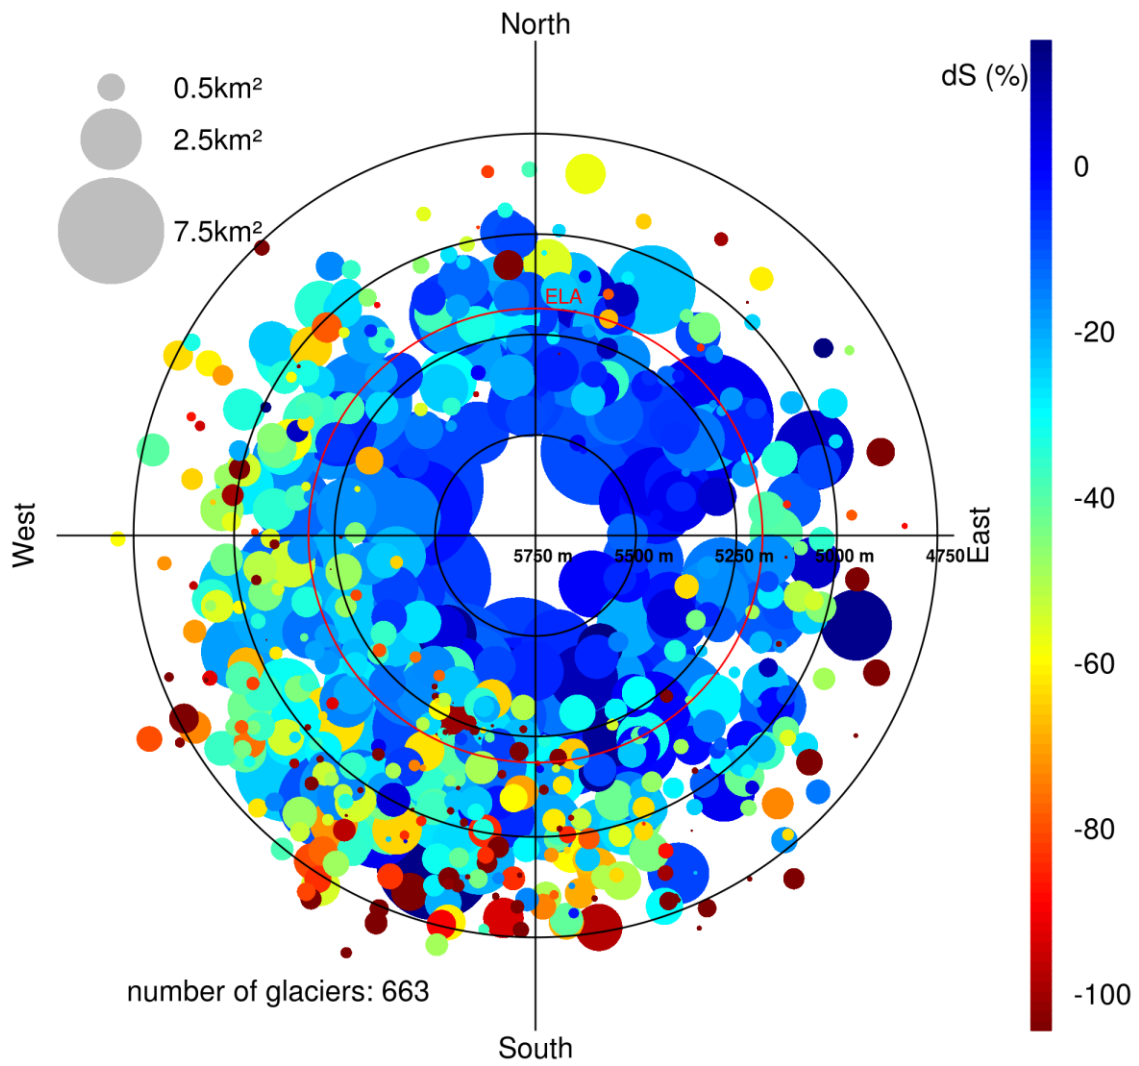

**Figure S8.** Polar plot of relative area changes (dot colour) in subregion R2 in the period 2000-2013 of individual glaciers. Dot size: glacier size in 2000; Radius: median elevation; Orientation: mean aspect. Red circle: equilibrium line altitude (ELA), see also Table S3.



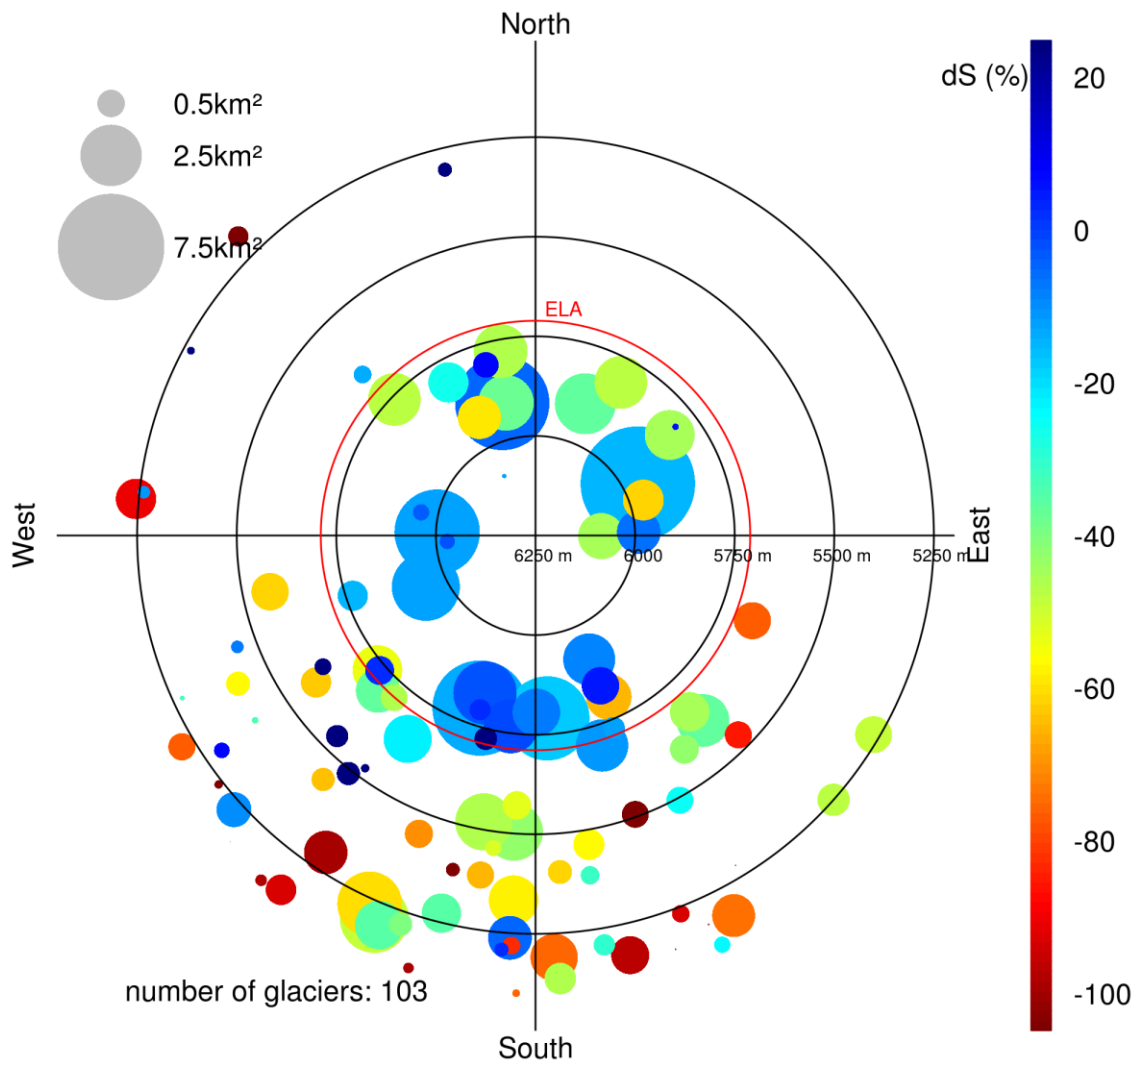

**Figure S9.** Polar plot of relative area changes (dot colour) in subregion R3 in the period 2000-2013 of individual glaciers. Dot size: glacier size in 2000; Radius: median elevation; Orientation: mean aspect. Red circle: equilibrium line altitude (ELA), see also Table S3.

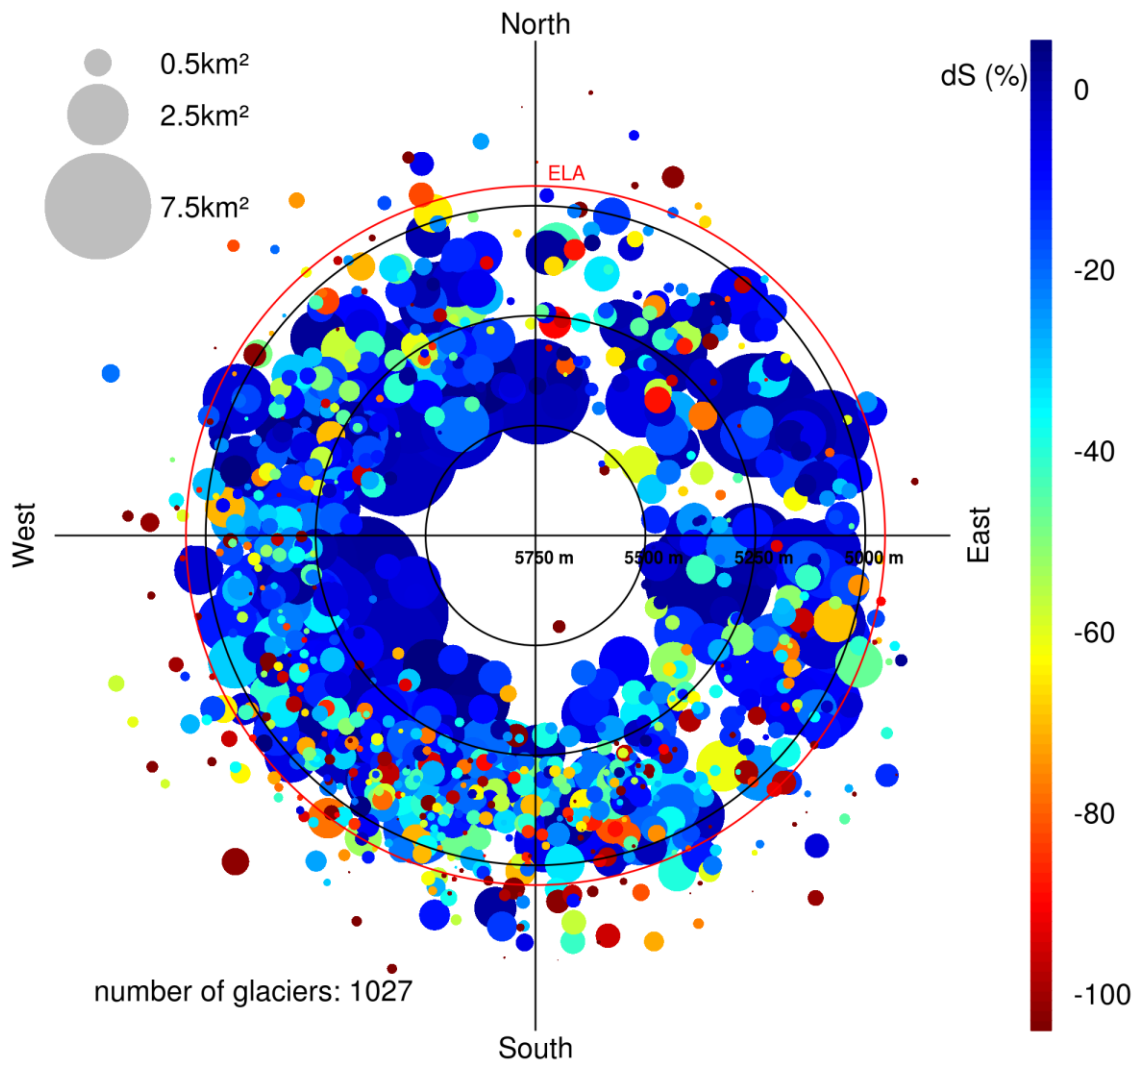

**Figure S10.** Polar plot of relative area changes (dot colour) in subregion R1 in the period 2013-2016 of individual glaciers. Dot size: glacier size in 2013; Radius: median elevation; Orientation: mean aspect. Red circle: equilibrium line altitude (ELA), see also Table S3.

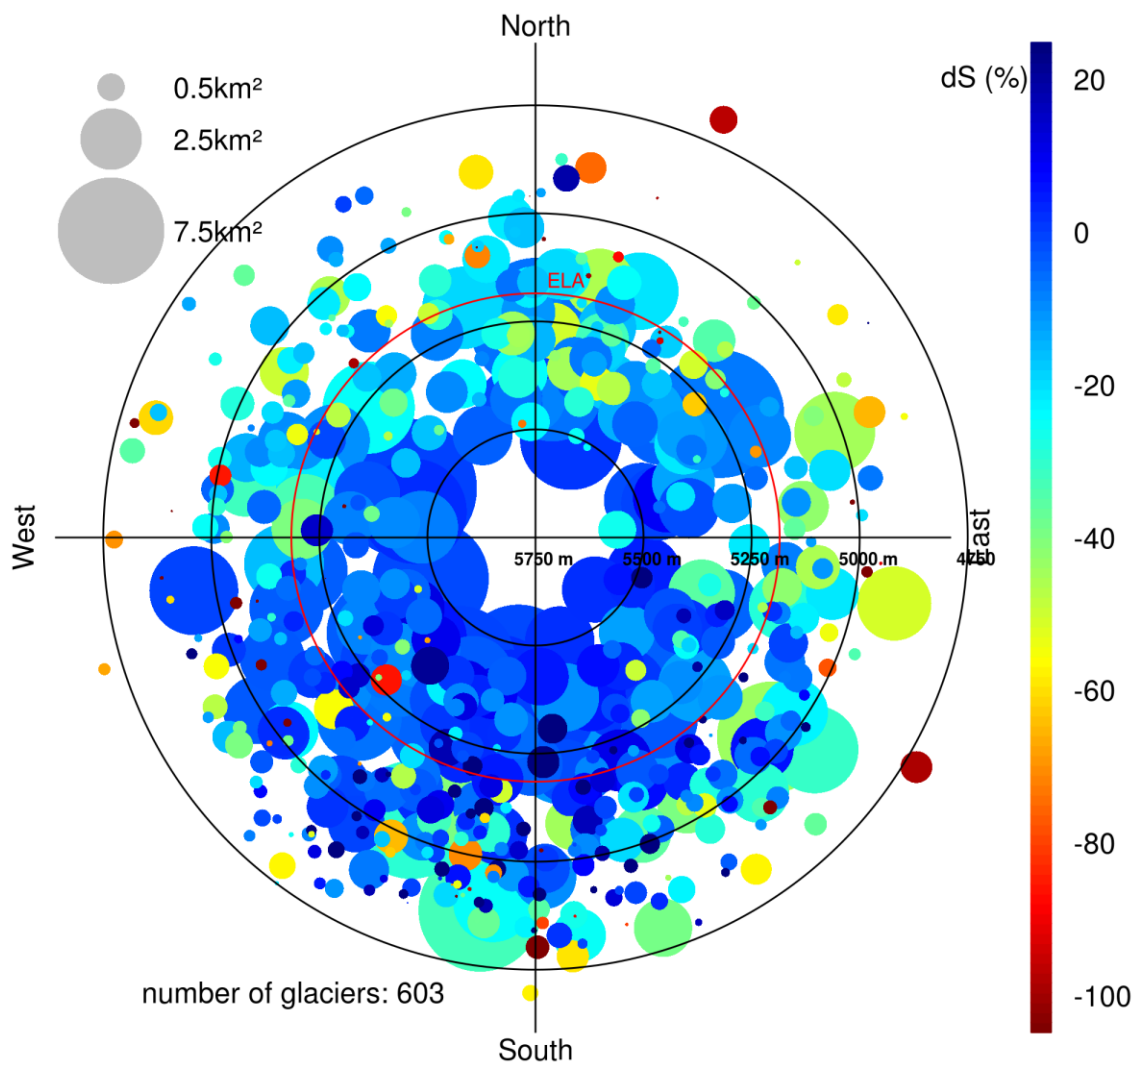

**Figure S11.** Polar plot of relative area changes (dot colour) in subregion R2 in the period 2013-2016 of individual glaciers. Dot size: glacier size in 2013; Radius: median elevation; Orientation: mean aspect. Red circle: equilibrium line altitude (ELA), see also Table S3.

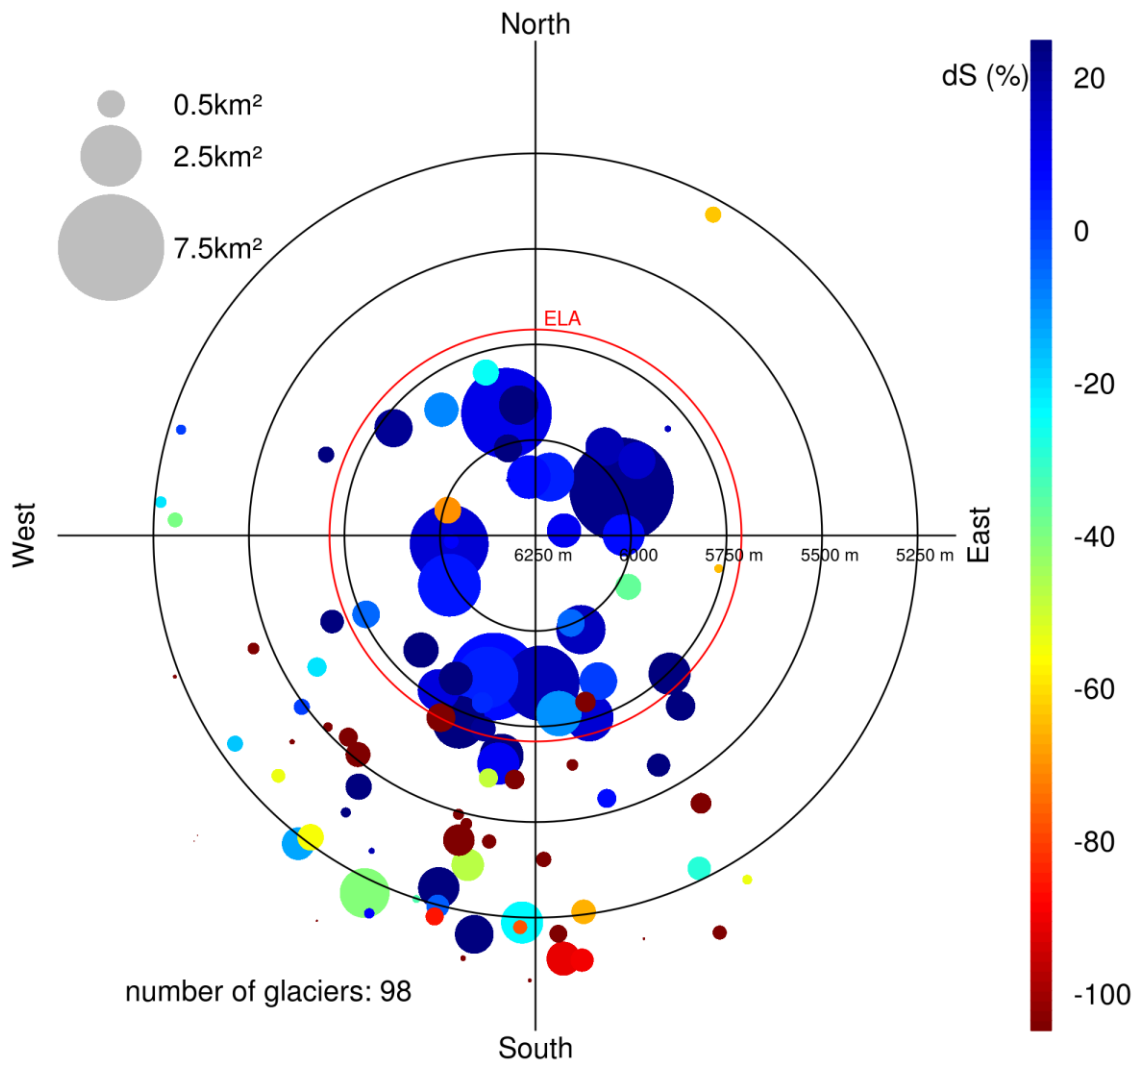

**Figure S12.** Polar plot of relative area changes (dot colour) in subregion R3 in the period 2013-2016 of individual glaciers. Dot size: glacier size in 2013; Radius: median elevation; Orientation: mean aspect. Red circle: equilibrium line altitude (ELA), see also Table S3.

### R2-2000-2016

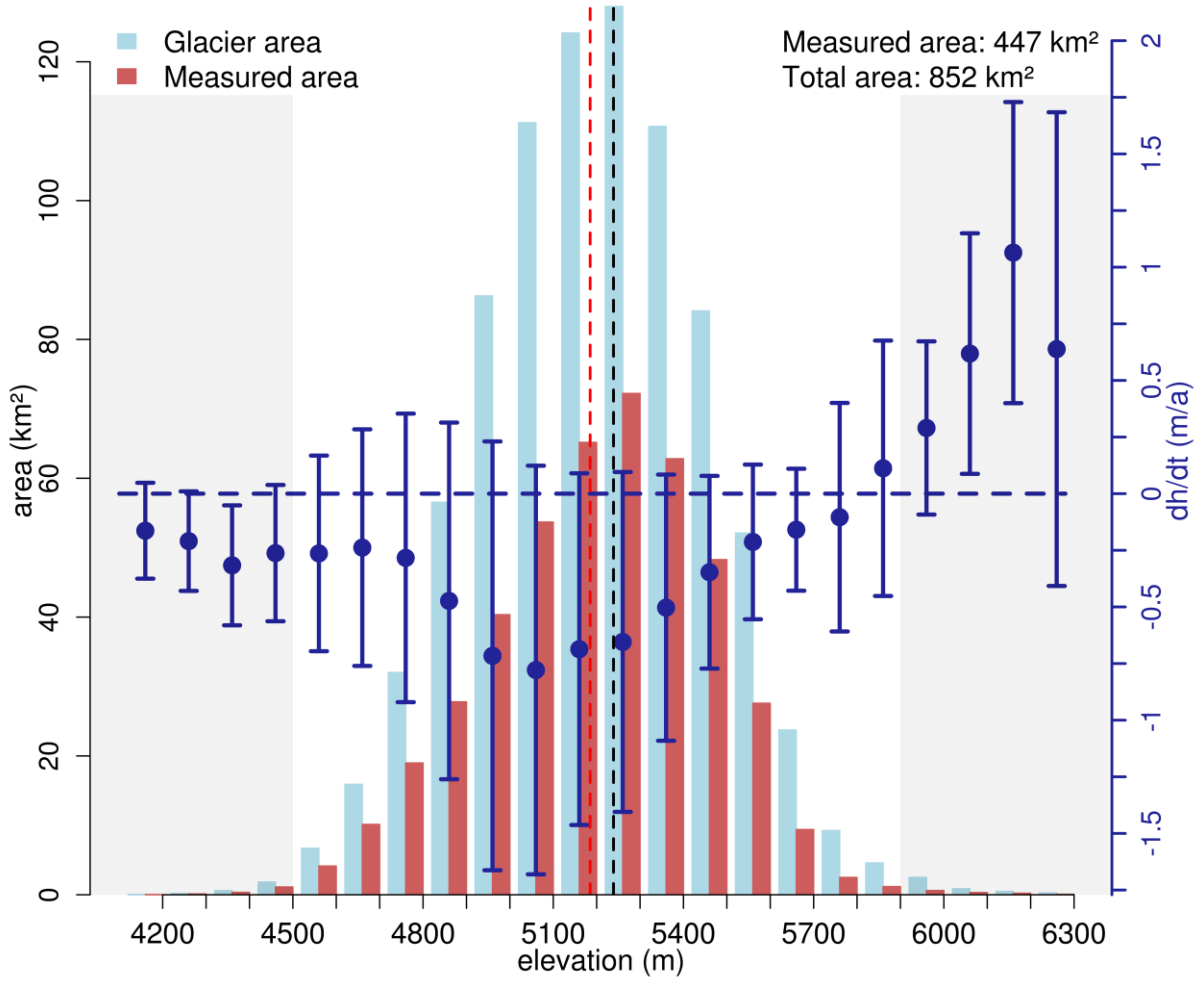

**Figure S13.** Hypsometric distribution of glacier area with elevation change ( $\Delta h/\Delta t$ ) measurements (red) and total glacier area (light blue) in subregion R2 in the interval 2000-2016. Blue dots represent the mean  $\Delta h/\Delta t$  value in each hypsometric bin. Error bars indicate NMAD of  $\Delta h/\Delta t$  for each hypsometric bin. Grey areas mark the lower and upper 1% quantile of the glacier area distribution. Black dashed line: mean glacier elevation; Red dashed line: equilibrium line altitude (ELA), see also Table S3. Area measurements are based on the glacier outlines from 2000, considering only regions with slopes below applied slope threshold ( $50^\circ$ , see Section 4.2)

### R3-2000-2016

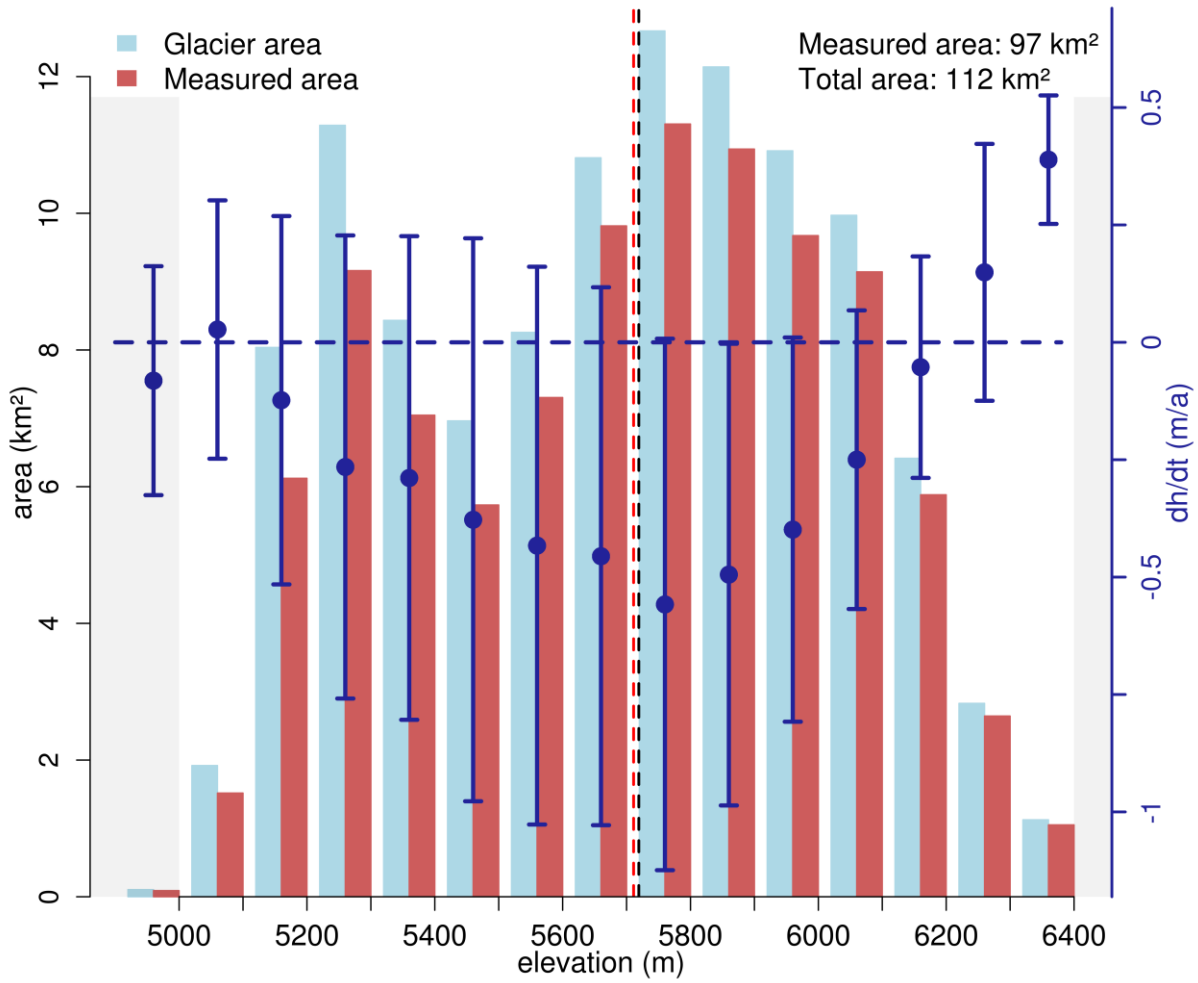

**Figure S14.** Hypsometric distribution of glacier area with elevation change ( $\Delta h/\Delta t$ ) measurements (red) and total glacier area (light blue) in subregion R3 in the interval 2000-2016. Blue dots represent the mean  $\Delta h/\Delta t$  value in each hypsometric bin. Error bars indicate NMAD of  $\Delta h/\Delta t$  for each hypsometric bin. Grey areas mark the lower and upper 1% quantile of the glacier area distribution. Black dashed line: mean glacier elevation; Red dashed line: equilibrium line altitude (ELA), see also Table S3. Area measurements are based on the glacier outlines from 2000, considering only regions with slopes below applied slope threshold (50°, see Section 4.2)

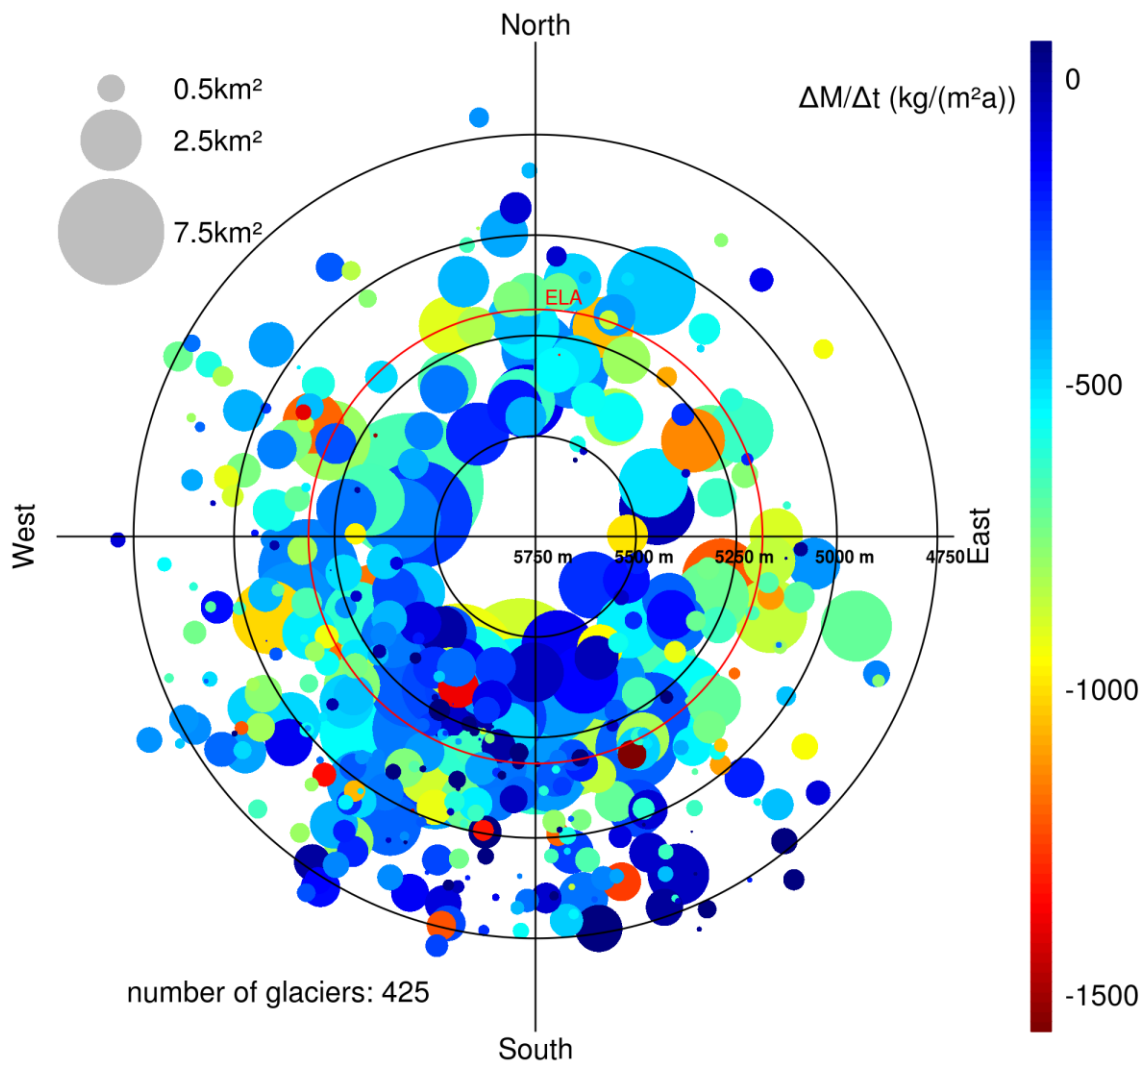

**Figure S15.** Polar plot of specific mass balance (dot colour) of individual glaciers in subregion R2 in the period 2000-2016 of individual glaciers. Dot size: glacier size in 2000; Radius: median elevation; Orientation: mean aspect. Red circle: equilibrium line altitude (ELA), see also Table S3. Note: only glaciers with elevation change information >50% are included.

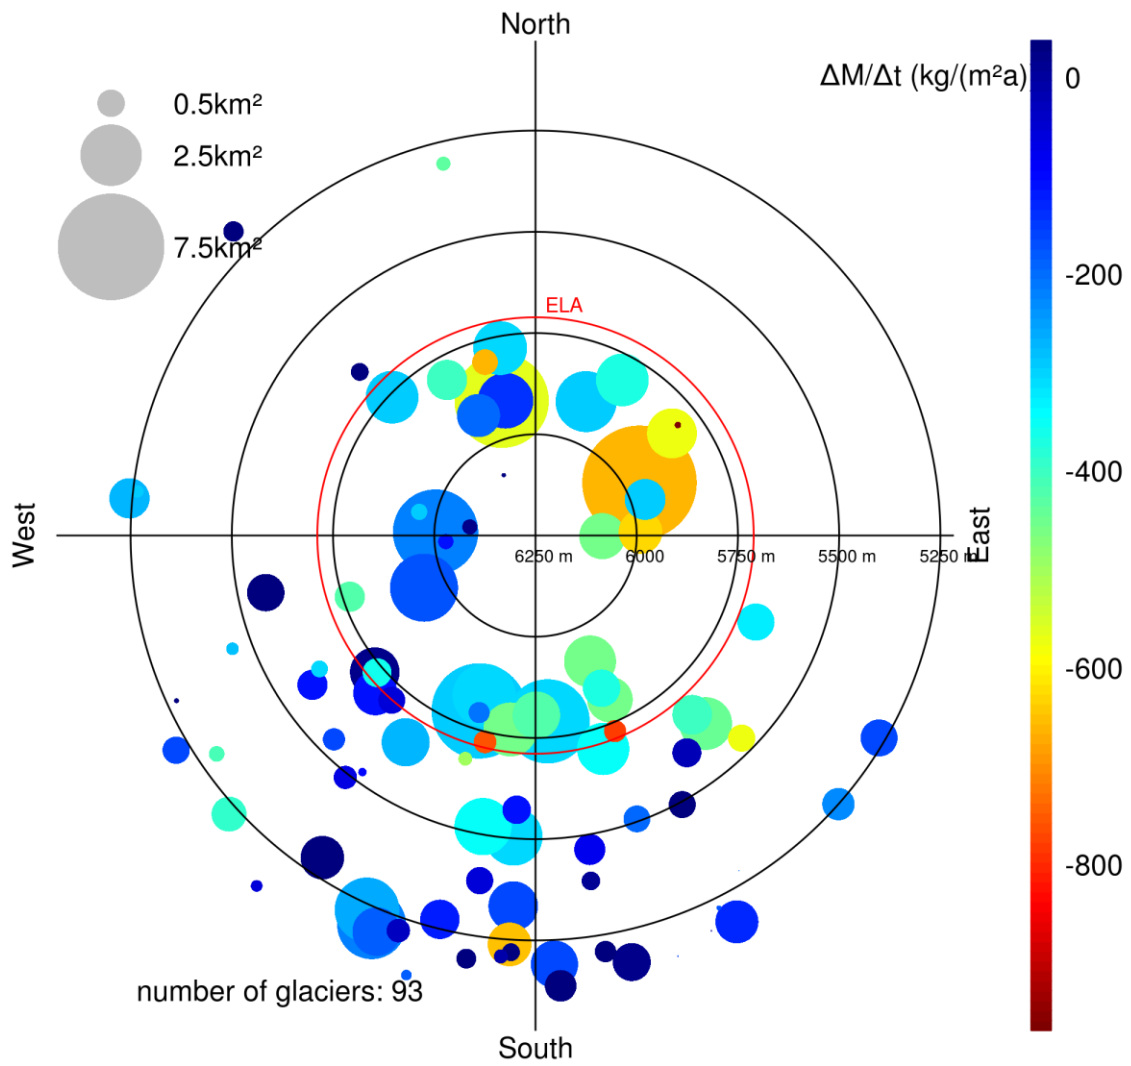

**Figure S16.** Polar plot of specific mass balance (dot colour) of individual glaciers in subregion R3 in the period 2000-2016 of individual glaciers. Dot size: glacier size in 2000; Radius: median elevation; Orientation: mean aspect. Red circle: equilibrium line altitude (ELA), see also Table S3. Note: only glaciers with elevation change information >50% are included.



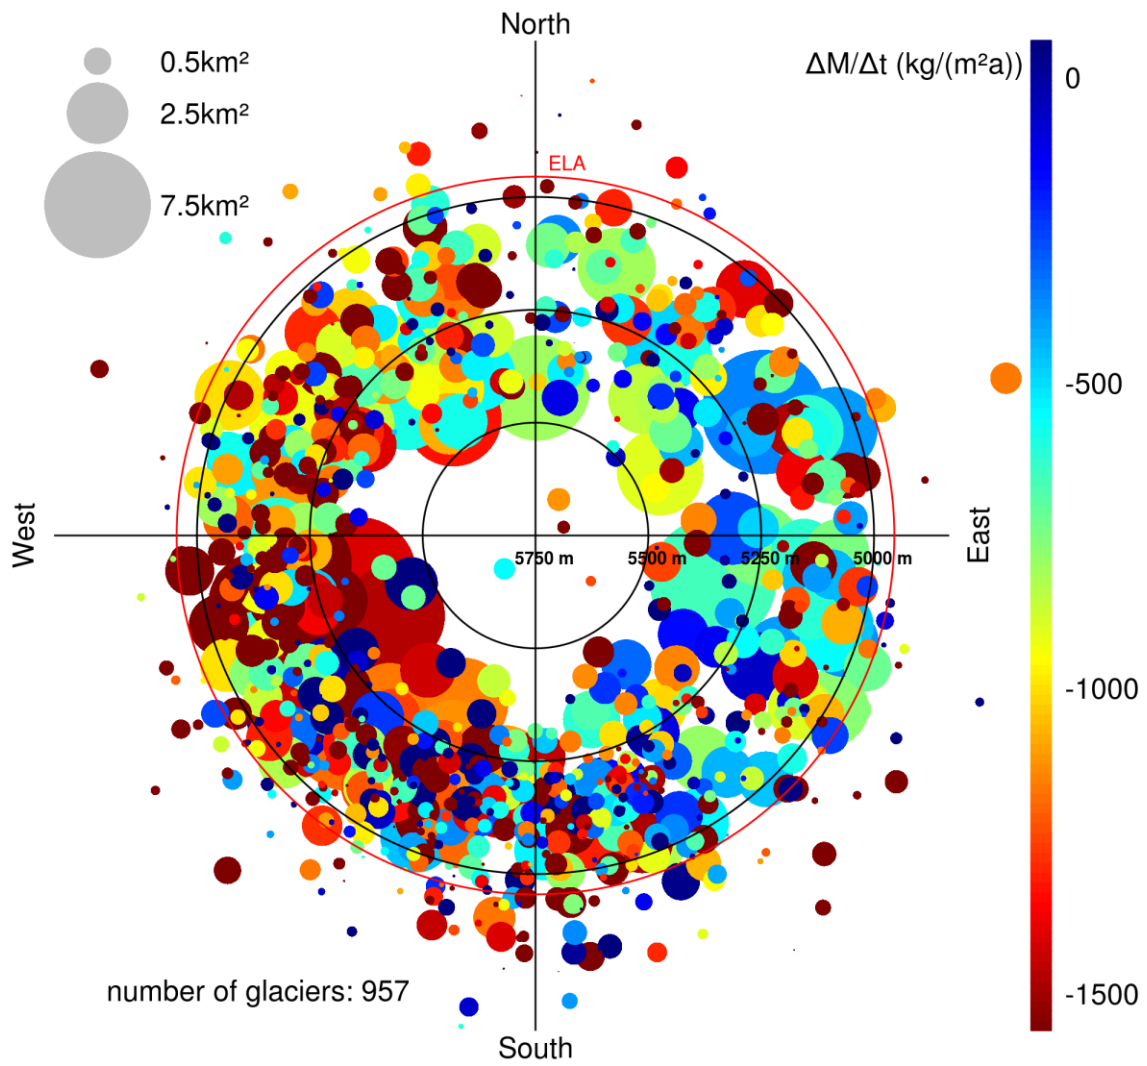

**Figure S17.** Polar plot of specific mass balance (dot colour) of individual glaciers in subregion R1 in the period 2013-2016 of individual glaciers. Dot size: glacier size in 2013; Radius: median elevation; Orientation: mean aspect. Red circle: equilibrium line altitude (ELA), see also Table S3. Note: only glaciers with elevation change information >50% are included.

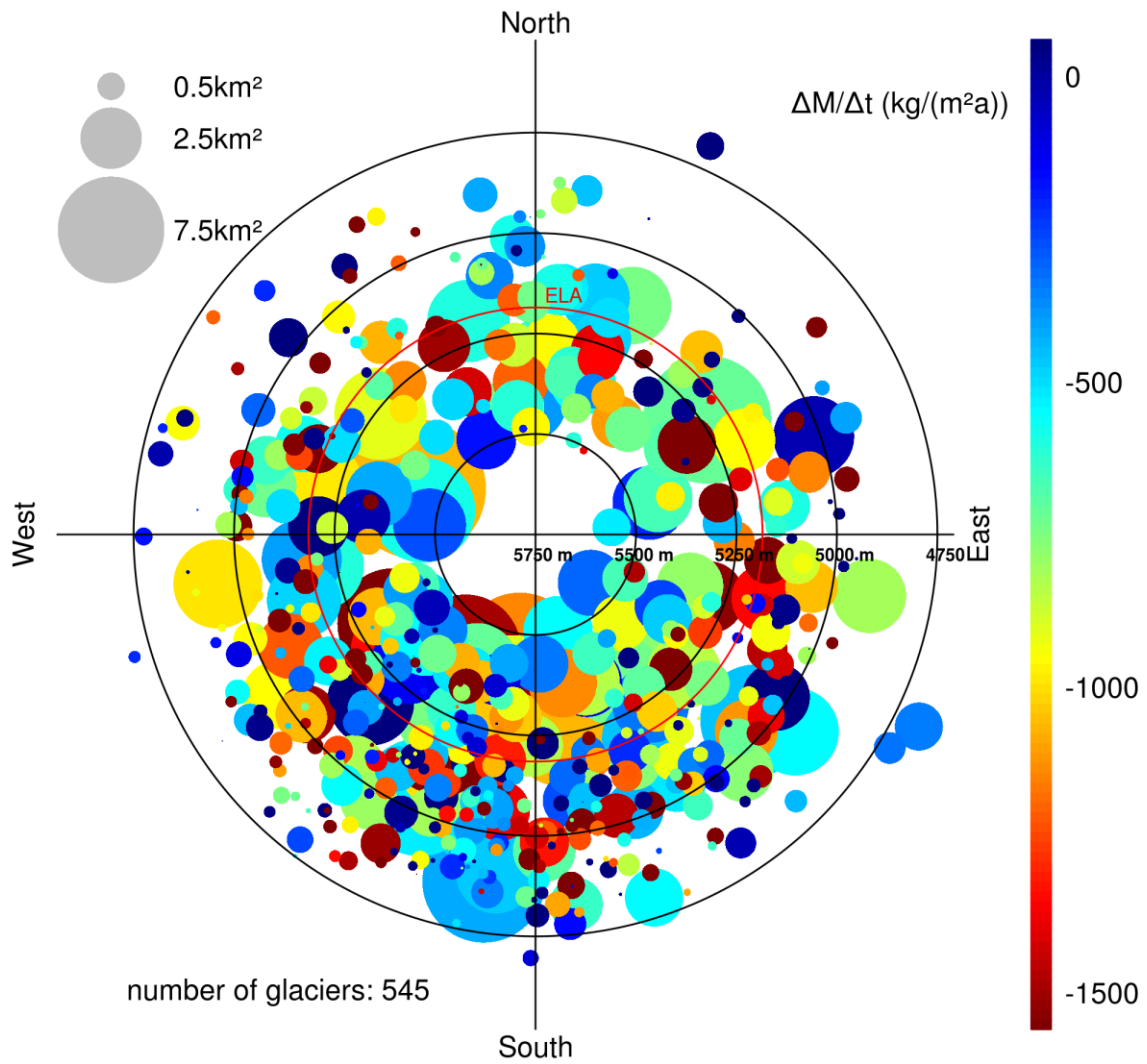

**Figure S18.** Polar plot of specific mass balance (dot colour) of individual glaciers in subregion R2 in the period 2013-2016 of individual glaciers. Dot size: glacier size in 2013; Radius: median elevation; Orientation: mean aspect. Red circle: equilibrium line altitude (ELA), see also Table S3. Note: only glaciers with elevation change information >50% are included.

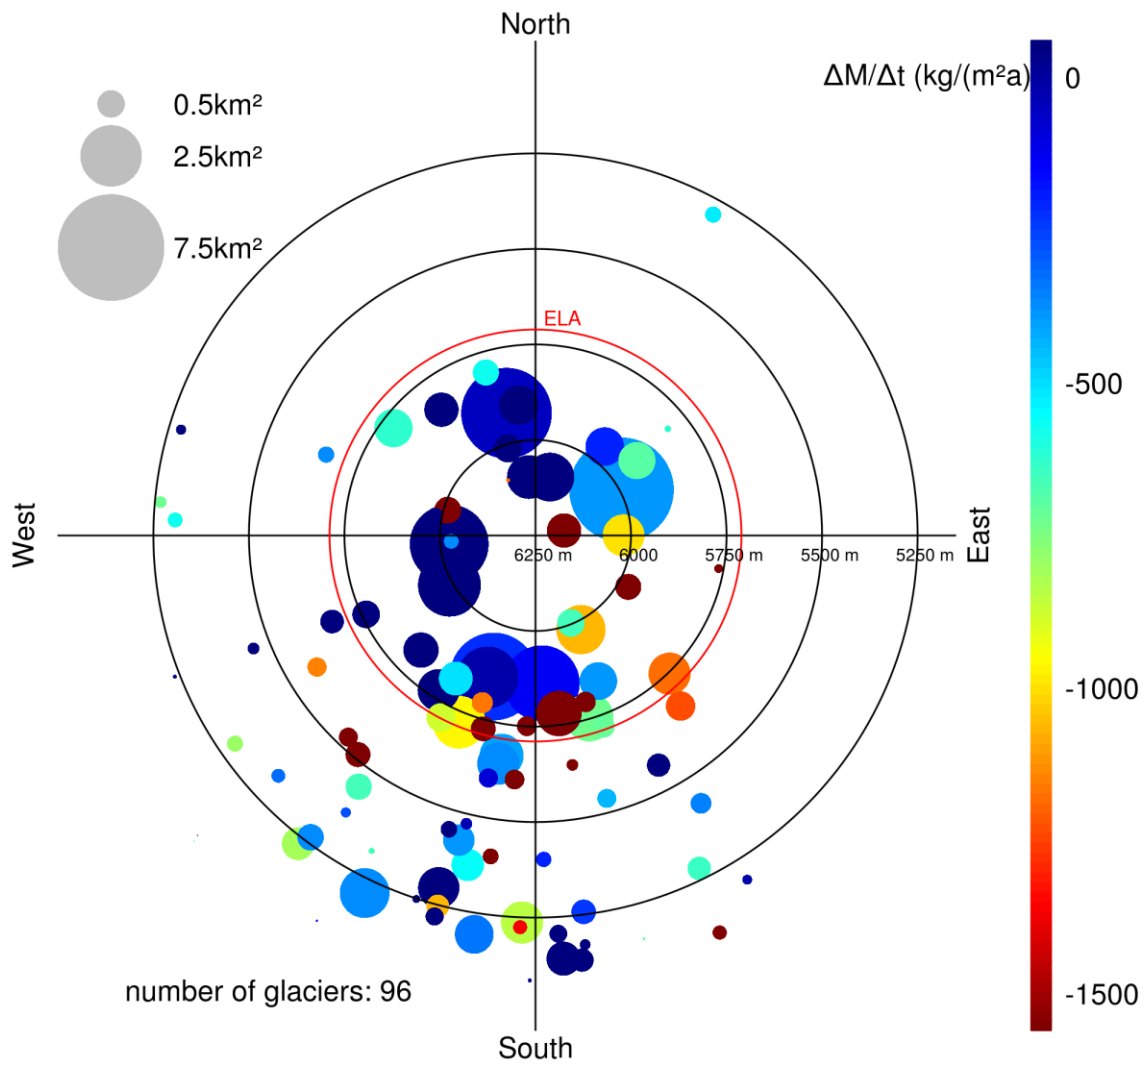

**Figure S19.** Polar plot of specific mass balance (dot colour) of individual glaciers in subregion R3 in the period 2013-2016 of individual glaciers. Dot size: glacier size in 2013; Radius: median elevation; Orientation: mean aspect. Red circle: equilibrium line altitude (ELA), see also Table S3. Note: only glaciers with elevation change information >50% are included.

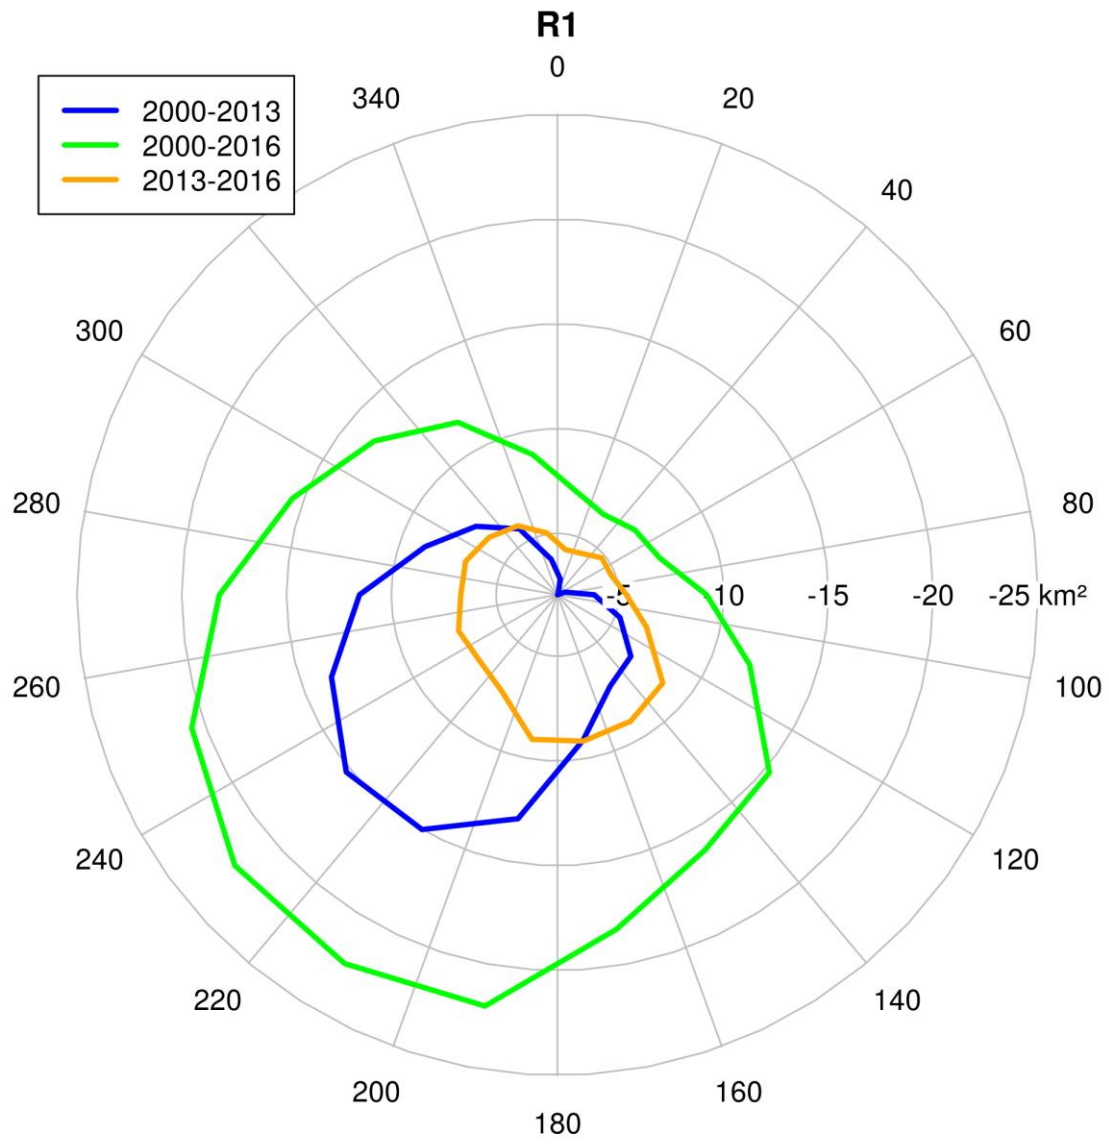

**Figure S20.** Polar plot of glacier area loss in subregion R1. The area losses are binned in aspect intervals of 20°.

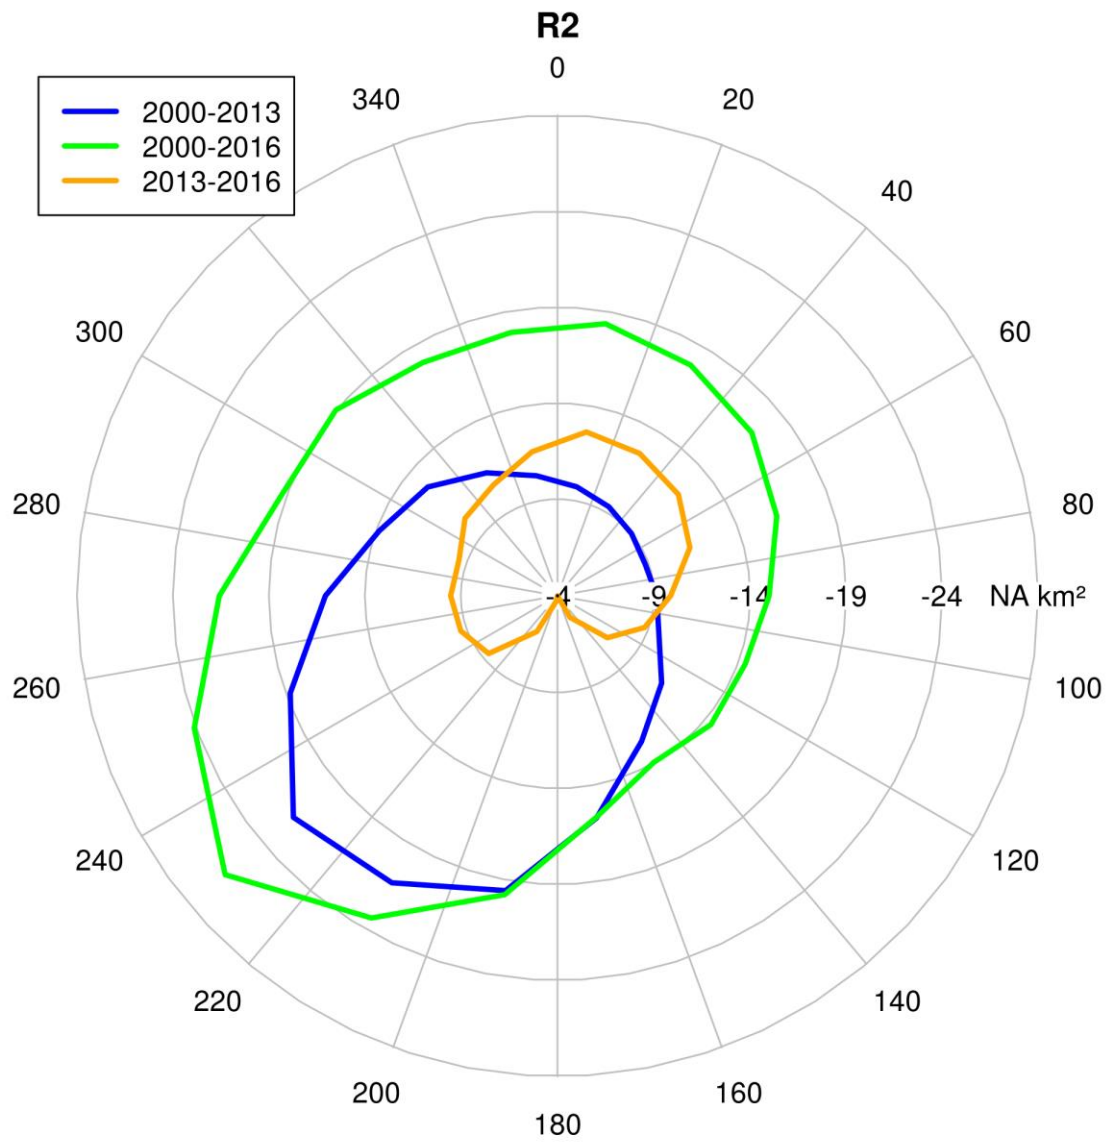

**Figure S21.** Polar plot of glacier area loss in subregion R2. The area losses are binned in aspect intervals of 20°.

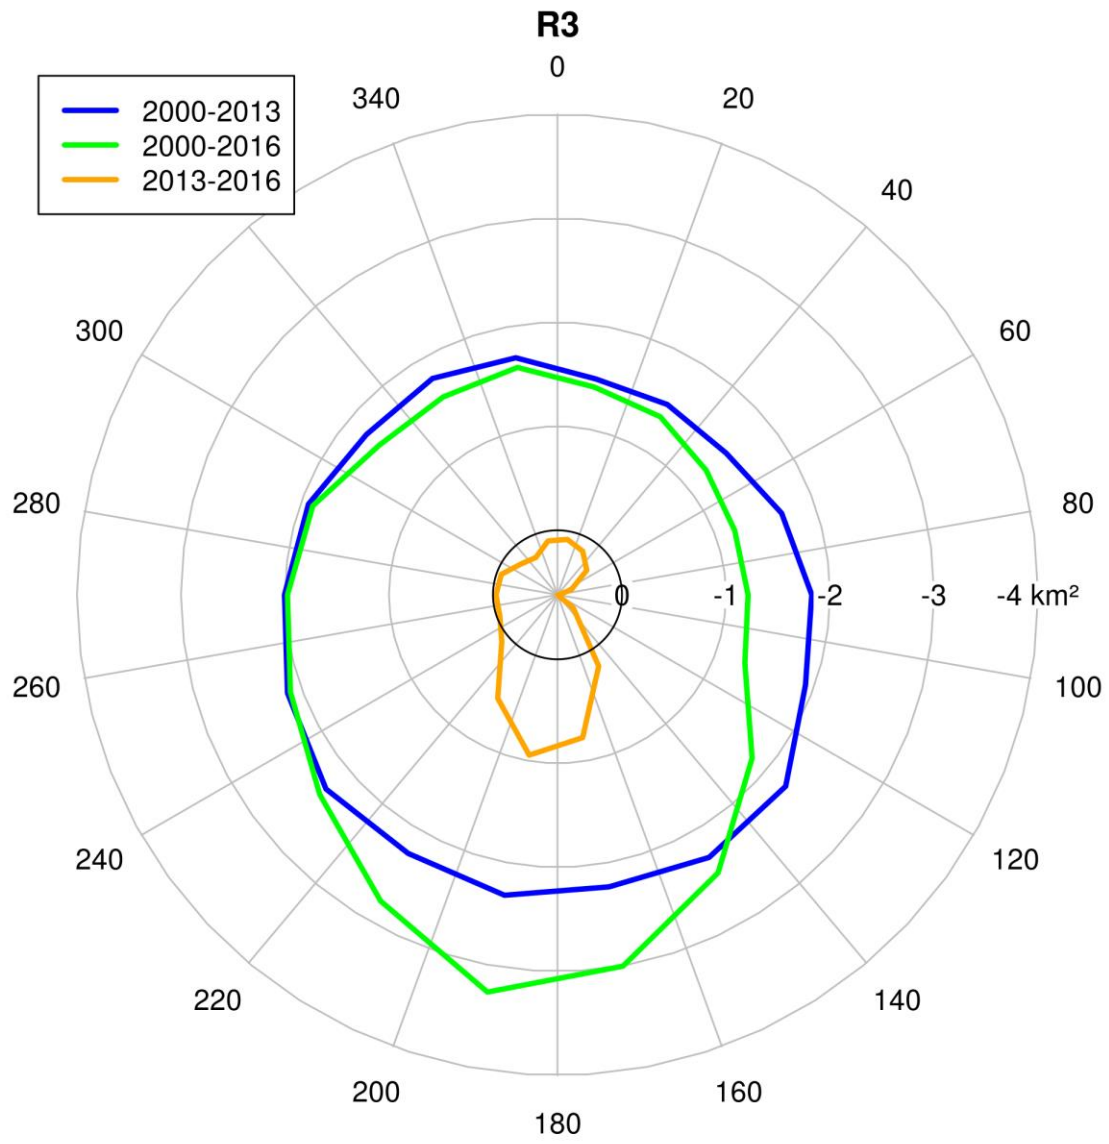

**Figure S22.** Polar plot of glacier area loss in subregion R3. The area losses are binned in aspect intervals of 20°.

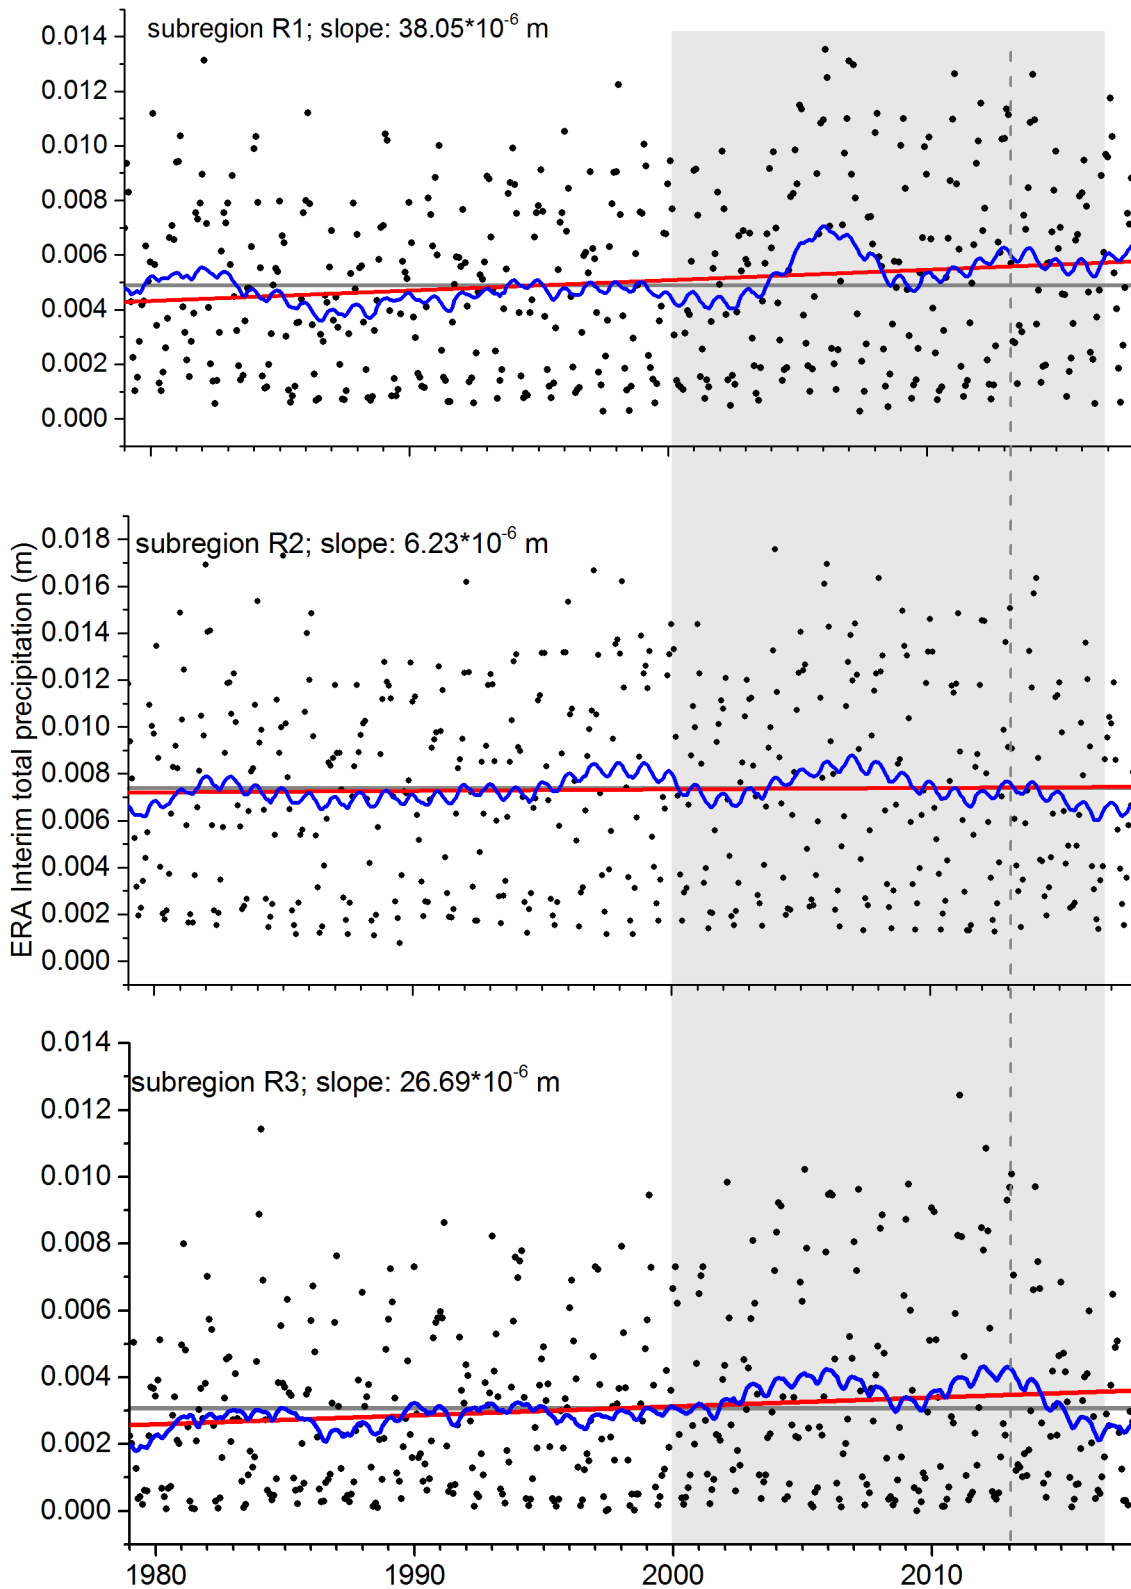

**Figure S23.** Total precipitation (monthly means of daily forecast accumulations) in the period 1979-2017 derived from ERA-Interim reanalysis data. Black dots: Spatial average values of glacier covered ERA-Interim grid cells in each subregion. Red line: long term trend (1979-2017), grey line: long term mean value; grey shaded area: period of mass budget and area change analysis, dashed grey line: marker for intermediate time step (early 2013)

### R3-2013-2016

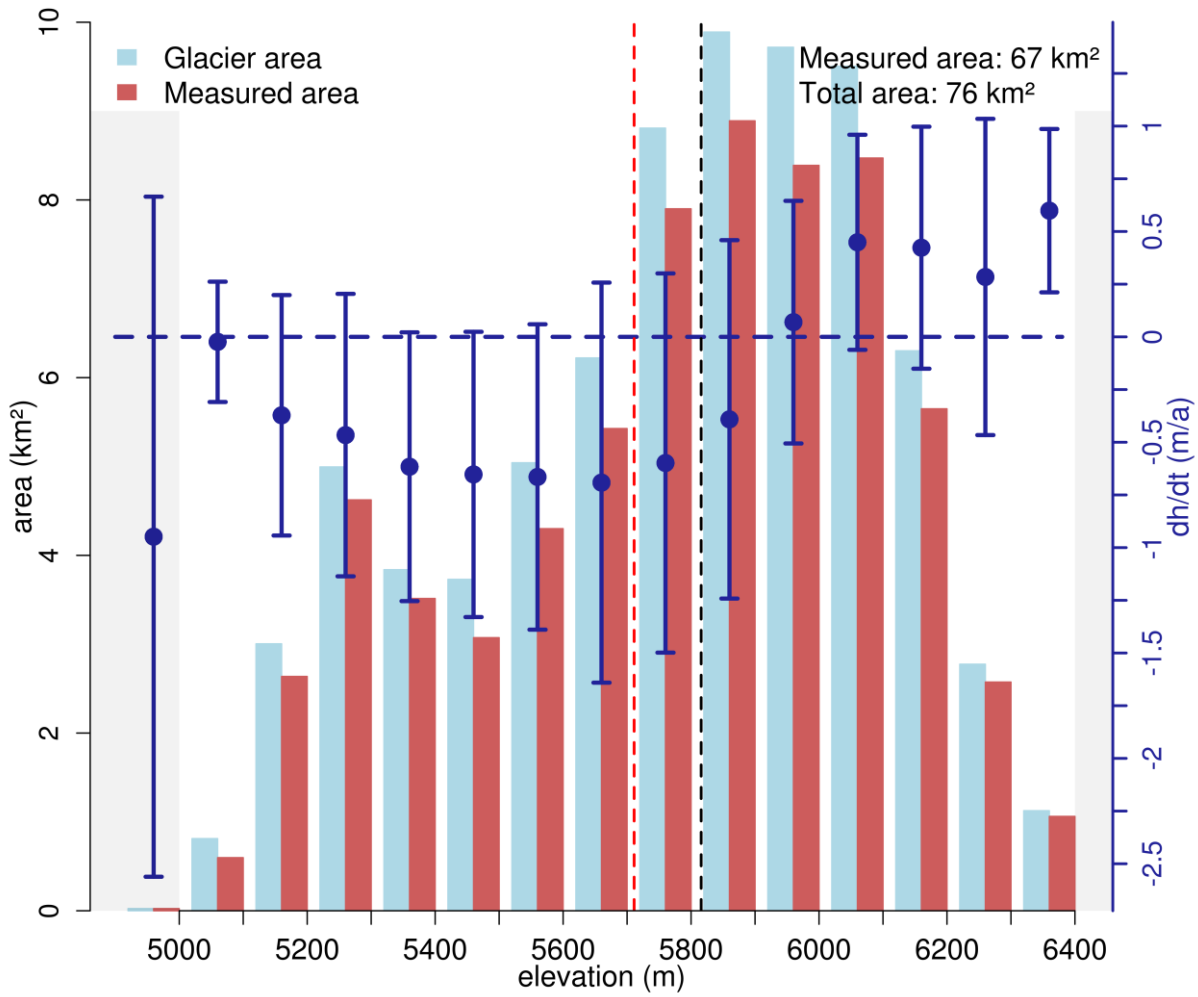

**Figure S24.** Hypsometric distribution of glacier area with elevation change ( $\Delta h/\Delta t$ ) measurements (red) and total glacier area (light blue) in subregion R3 in the interval 2013-2016. Blue dots represent the mean  $\Delta h/\Delta t$  value in each hypsometric bin. Error bars indicate NMAD of  $\Delta h/\Delta t$  for each hypsometric bin. Grey areas mark the lower and upper 1% quantile of the glacier area distribution. Black dashed line: mean glacier elevation; Red dashed line: equilibrium line altitude (ELA), see also Table S3. Area measurements are based on the glacier outlines from 2013, considering only regions with slopes below applied slope threshold (50°, see Section 4.2)



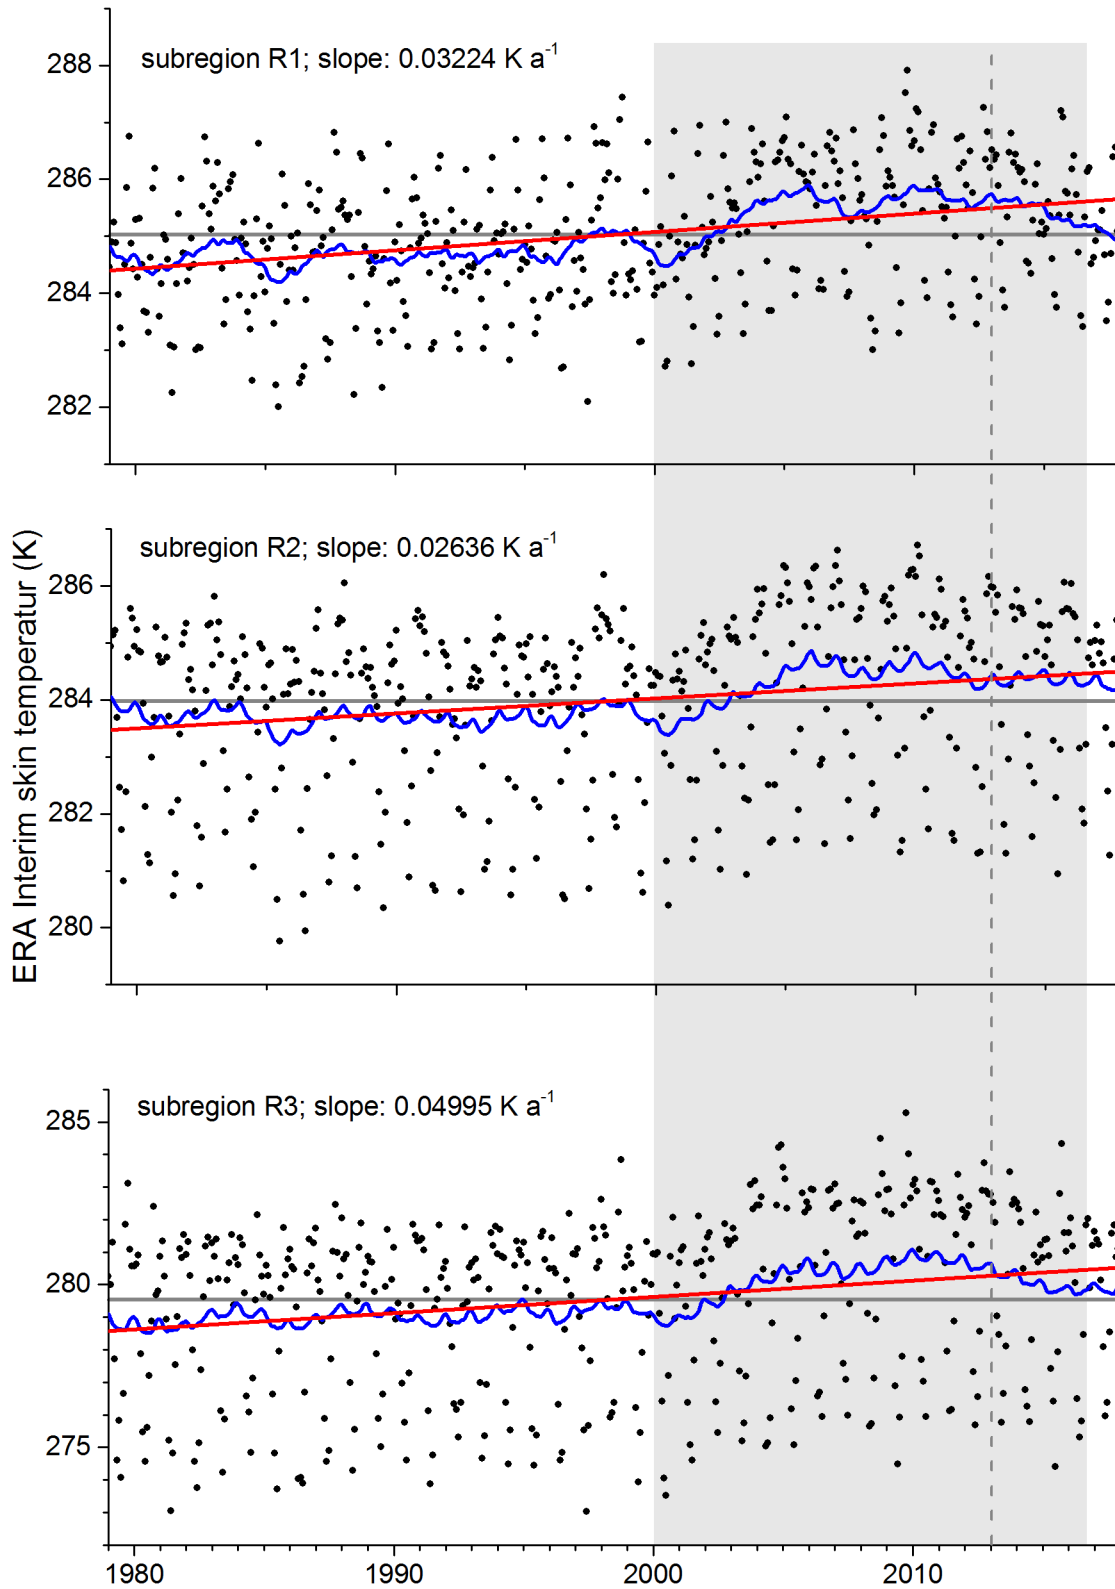

**Figure S25.** Skin temperature (monthly means of daily means) in the period 1979-2017 derived from ERA-Interim reanalysis data. Black dots: Spatial average values of glacier covered ERA-Interim grid cells in each subregion. Red line: long term trend (1979-2017), grey line: long term mean value; grey shaded area: period of mass budget and area change analysis, dashed grey line: marker for intermediate time step (early 2013)

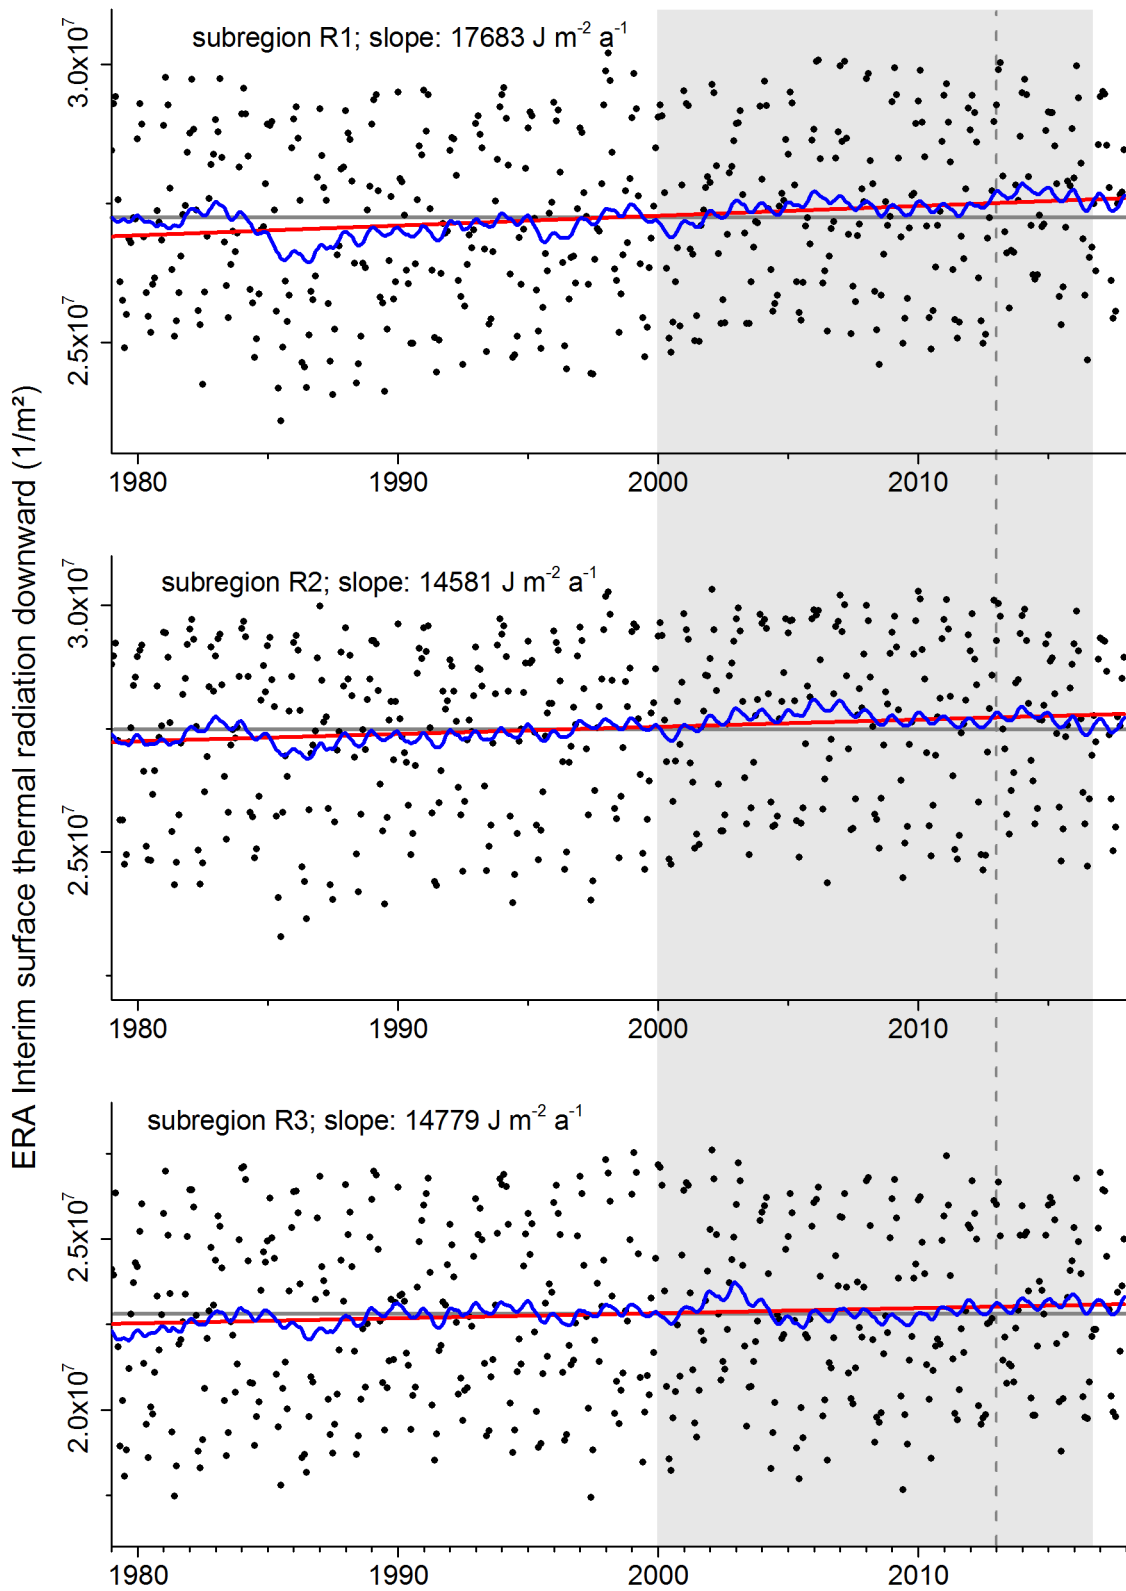

**Figure S26.** Surface thermal radiation downward (monthly means of daily forecast accumulations) in the period 1979-2017 derived from ERA-Interim reanalysis data. Black dots: Spatial average values of glacier covered ERA-Interim grid cells in each subregion. Red line: long term trend (1979-2017), grey line: long term mean value; grey shaded area: period of mass budget and area change analysis, dashed grey line: marker for intermediate time step (early 2013)

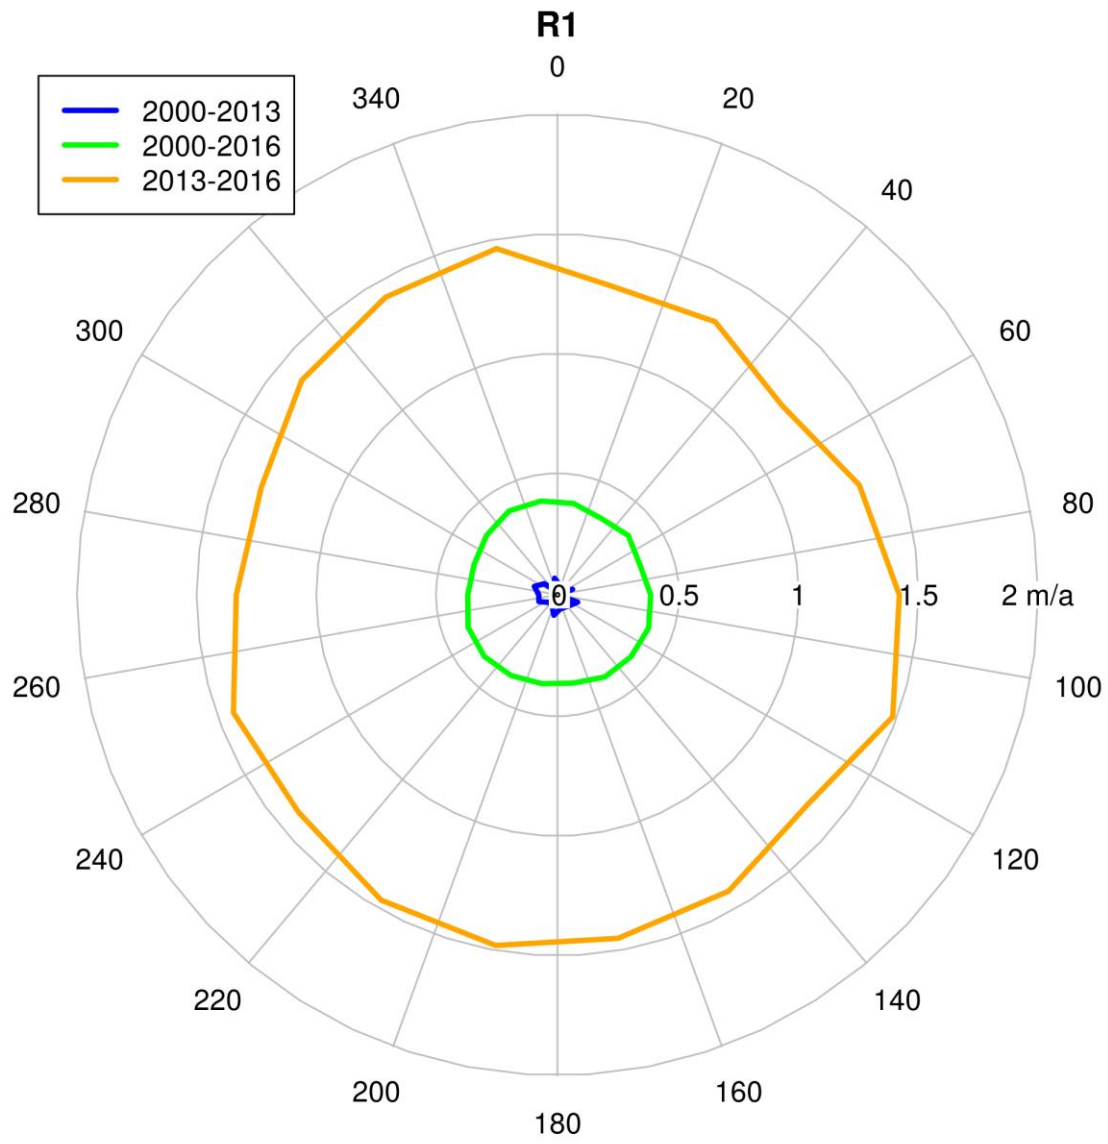

**Figure S27.** Polar plot of glacier surface lowering in subregion R1. The surface lowering measurements are averaged in aspect intervals of 20° (mean values).

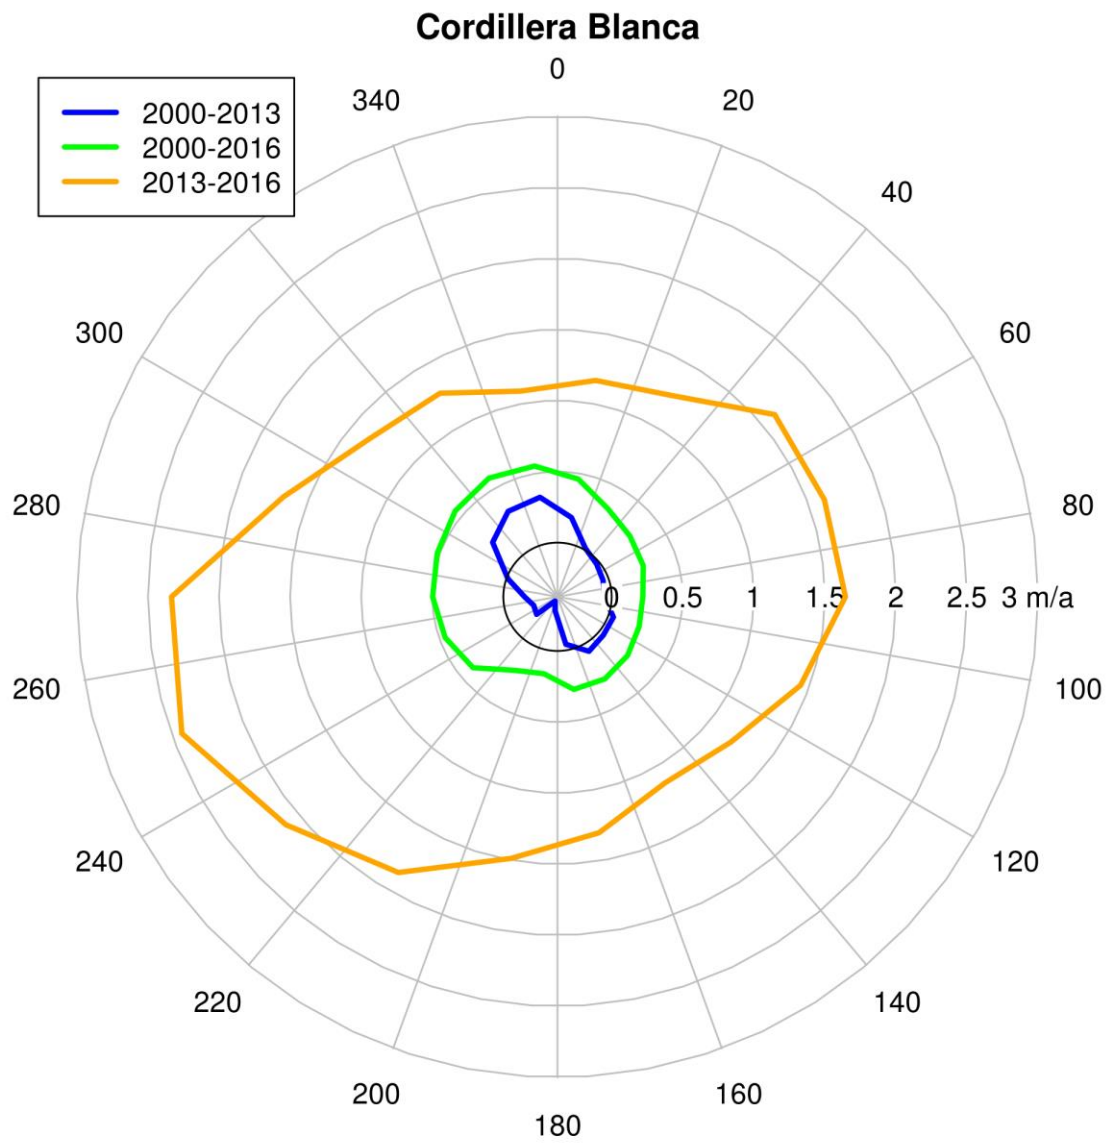

**Figure S28.** Polar plot of glacier surface lowering in Cordillera Blanca (subregion R1). The surface lowering measurements are averaged in aspect intervals of 20° (mean values).

**Table S1.** Overview of analysed TanDEM-X imagery for elevation change analysis (continued on next pages)

| date                                     | path | strip | path direction* | images |
|------------------------------------------|------|-------|-----------------|--------|
| Subregion: R1 northern wet outer tropics |      |       |                 |        |
| 2011-12-04                               | 081  | 70    | D               | 1      |
| 2011-12-25                               | 066  | 60    | D               | 1      |
| 2012-01-05                               | 066  | 50    | D               | 3      |
| 2012-01-06                               | 081  | 80    | D               | 2      |
| 2012-01-11                               | 157  | 70    | D               | 1      |
| 2012-01-16                               | 066  | 20    | D               | 2      |
| 2012-01-22                               | 157  | 10    | D               | 1      |
| 2012-01-22                               | 157  | 10    | D               | 3      |
| 2012-01-22                               | 157  | 10    | D               | 1      |
| 2012-01-27                               | 066  | 30    | D               | 3      |
| 2012-02-02                               | 157  | 60    | D               | 4      |
| 2012-02-07                               | 066  | 40    | D               | 2      |
| 2012-02-13                               | 157  | 80    | D               | 2      |
| 2012-02-18                               | 066  | 10    | D               | 2      |
| 2012-02-24                               | 157  | 50    | D               | 4      |
| 2012-03-01                               | 081  | 90    | D               | 1      |
| 2012-03-06                               | 157  | 90    | D               | 1      |
| 2012-03-06                               | 157  | 20    | D               | 1      |
| 2012-03-12                               | 081  | 80    | D               | 1      |
| 2012-03-17                               | 157  | 30    | D               | 3      |
| 2012-03-22                               | 066  | 60    | D               | 2      |
| 2012-03-23                               | 081  | 60    | D               | 1      |
| 2012-03-28                               | 157  | 40    | D               | 2      |
| 2012-03-28                               | 157  | 40    | D               | 2      |
| 2012-12-30                               | 028  | 85    | A               | 4      |
| 2013-01-10                               | 028  | 75    | A               | 6      |
| 2013-01-14                               | 081  | 85    | D               | 6      |
| 2013-01-21                               | 028  | 65    | A               | 4      |
| 2013-01-24                               | 066  | 45    | D               | 2      |
| 2013-01-27                               | 119  | 55    | A               | 1      |
| 2013-01-30                               | 157  | 65    | D               | 1      |
| 2013-02-01                               | 028  | 55    | A               | 5      |
| 2013-02-04                               | 066  | 55    | D               | 2      |
| 2013-02-05                               | 081  | 65    | D               | 1      |
| 2013-02-10                               | 157  | 45    | D               | 2      |
| 2013-02-12                               | 028  | 45    | A               | 1      |
| 2013-02-15                               | 066  | 25    | D               | 2      |
| 2013-02-21                               | 157  | 35    | D               | 2      |
| 2013-02-26                               | 066  | 15    | D               | 1      |
| 2013-03-01                               | 119  | 45    | A               | 1      |
| 2013-03-04                               | 157  | 25    | D               | 1      |
| 2013-03-12                               | 119  | 35    | A               | 2      |
| 2013-03-15                               | 157  | 15    | D               | 5      |
| 2013-03-23                               | 119  | 25    | A               | 7      |
| 2013-03-26                               | 157  | 05    | D               | 6      |
| 2016-09-08                               | 119  | 10    | A               | 4      |
| 2016-09-13                               | 028  | 50    | A               | 2      |
| 2016-09-16                               | 066  | 10    | D               | 2      |
| 2016-09-19                               | 119  | 20    | A               | 1      |
| 2016-09-27                               | 066  | 20    | D               | 2      |
| 2016-09-30                               | 119  | 30    | A               | 2      |
| 2016-10-08                               | 066  | 40    | D               | 2      |
| 2016-10-11                               | 119  | 40    | A               | 5      |
| 2016-10-14                               | 157  | 40    | D               | 1      |
| 2016-10-16                               | 028  | 90    | A               | 5      |
| 2016-10-19                               | 066  | 50    | D               | 2      |
| 2016-10-22                               | 119  | 50    | A               | 1      |
| 2016-10-22                               | 119  | 50    | A               | 2      |
| 2016-10-25                               | 157  | 50    | D               | 1      |
| 2016-10-27                               | 028  | 60    | A               | 2      |
| 2016-11-02                               | 119  | 60    | A               | 2      |
| 2016-11-16                               | 157  | 60    | D               | 1      |
| 2016-12-08                               | 157  | 80    | D               | 2      |
| 2016-12-19                               | 157  | 90    | D               | 2      |

Subregion: R2 southern wet outer tropics

|            |     |    |   |   |
|------------|-----|----|---|---|
| 2012-12-18 | 005 | 75 | D | 1 |
| 2012-12-29 | 005 | 65 | D | 1 |
| 2012-12-31 | 043 | 85 | A | 2 |
| 2013-01-04 | 096 | 75 | D | 3 |
| 2013-01-09 | 005 | 85 | D | 1 |
| 2013-01-10 | 020 | 75 | D | 2 |
| 2013-01-11 | 043 | 75 | A | 3 |
| 2013-01-15 | 096 | 65 | D | 1 |
| 2013-01-15 | 096 | 65 | D | 1 |
| 2013-01-17 | 134 | 85 | A | 3 |
| 2013-01-20 | 005 | 45 | D | 1 |
| 2013-01-22 | 043 | 65 | A | 1 |
| 2013-01-26 | 096 | 85 | D | 2 |
| 2013-01-28 | 134 | 75 | A | 2 |
| 2013-01-31 | 005 | 55 | D | 1 |
| 2013-02-01 | 020 | 85 | D | 2 |
| 2013-02-02 | 043 | 55 | A | 1 |
| 2013-02-06 | 096 | 45 | D | 1 |
| 2013-02-08 | 134 | 65 | A | 1 |
| 2013-02-13 | 043 | 45 | A | 1 |
| 2013-02-17 | 096 | 35 | D | 1 |
| 2013-02-19 | 134 | 55 | A | 2 |
| 2013-02-22 | 005 | 15 | D | 2 |
| 2013-02-24 | 043 | 35 | A | 2 |
| 2013-02-28 | 096 | 25 | D | 2 |
| 2013-03-02 | 134 | 45 | A | 1 |
| 2013-03-07 | 043 | 25 | A | 2 |
| 2013-03-11 | 096 | 15 | D | 2 |
| 2013-03-13 | 134 | 35 | A | 2 |
| 2013-03-16 | 005 | 05 | D | 2 |
| 2013-03-22 | 096 | 05 | D | 3 |
| 2013-03-24 | 134 | 25 | A | 3 |
| 2013-03-27 | 005 | 40 | D | 1 |
| 2013-04-02 | 096 | 70 | D | 1 |
| 2013-04-07 | 005 | 75 | D | 1 |
| 2013-04-18 | 005 | 10 | D | 2 |
| 2016-09-07 | 096 | 80 | D | 2 |
| 2016-09-09 | 134 | 20 | A | 2 |
| 2016-09-12 | 005 | 10 | D | 2 |
| 2016-09-13 | 020 | 90 | D | 1 |
| 2016-09-14 | 043 | 30 | A | 1 |
| 2016-09-18 | 096 | 10 | D | 1 |
| 2016-09-20 | 134 | 10 | A | 3 |
| 2016-09-29 | 096 | 20 | D | 1 |
| 2016-10-01 | 134 | 30 | A | 2 |
| 2016-10-04 | 005 | 40 | D | 1 |
| 2016-10-12 | 134 | 40 | A | 2 |
| 2016-10-15 | 005 | 50 | D | 1 |
| 2016-10-21 | 096 | 30 | D | 2 |
| 2016-10-23 | 134 | 50 | A | 3 |
| 2016-11-18 | 020 | 80 | D | 1 |
| 2016-11-28 | 005 | 60 | D | 1 |
| 2016-12-20 | 005 | 70 | D | 2 |
| 2016-12-26 | 096 | 70 | D | 2 |

Subregion: R3 dry outer tropics

|            |     |    |   |   |
|------------|-----|----|---|---|
| 2012-12-02 | 096 | 15 | D | 1 |
| 2012-12-07 | 005 | 10 | D | 1 |
| 2012-12-29 | 005 | 65 | D | 1 |
| 2012-12-29 | 005 | 65 | D | 1 |
| 2012-12-31 | 043 | 85 | A | 1 |
| 2013-01-09 | 005 | 85 | D | 2 |
| 2013-01-11 | 043 | 75 | A | 4 |
| 2013-01-16 | 119 | 85 | A | 2 |
| 2013-01-20 | 005 | 45 | D | 3 |
| 2013-01-22 | 043 | 65 | A | 1 |
| 2013-01-22 | 043 | 65 | A | 2 |
| 2013-01-31 | 005 | 55 | D | 3 |
| 2013-02-02 | 043 | 55 | A | 2 |

|            |     |    |   |   |
|------------|-----|----|---|---|
| 2013-02-07 | 119 | 75 | A | 2 |
| 2013-02-13 | 043 | 45 | A | 4 |
| 2013-02-19 | 134 | 45 | A | 1 |
| 2013-02-24 | 043 | 35 | A | 3 |
| 2013-03-02 | 134 | 35 | A | 1 |
| 2013-03-07 | 043 | 25 | A | 2 |
| 2013-03-10 | 081 | 25 | D | 2 |
| 2013-03-13 | 134 | 25 | A | 2 |
| 2013-03-18 | 043 | 15 | A | 2 |
| 2013-03-21 | 081 | 15 | D | 2 |
| 2013-03-24 | 134 | 15 | A | 2 |
| 2013-04-02 | 096 | 70 | D | 2 |
| 2013-04-13 | 096 | 55 | D | 2 |
| 2013-04-24 | 096 | 45 | D | 2 |
| 2014-01-04 | 134 | 05 | A | 2 |
| 2014-01-15 | 134 | 15 | A | 2 |
| 2014-01-26 | 134 | 25 | A | 2 |
| 2014-03-09 | 096 | 50 | D | 2 |
| 2014-03-20 | 096 | 60 | D | 3 |
| 2016-09-07 | 096 | 10 | D | 1 |
| 2016-09-08 | 119 | 70 | A | 2 |
| 2016-09-09 | 134 | 10 | A | 2 |
| 2016-09-12 | 005 | 20 | D | 1 |
| 2016-09-14 | 043 | 20 | A | 1 |
| 2016-09-20 | 134 | 20 | A | 4 |
| 2016-09-23 | 005 | 30 | D | 2 |
| 2016-09-29 | 096 | 20 | D | 1 |
| 2016-09-30 | 119 | 80 | A | 1 |
| 2016-10-01 | 134 | 30 | A | 2 |
| 2016-10-04 | 005 | 40 | D | 2 |
| 2016-10-11 | 119 | 90 | A | 1 |
| 2016-10-12 | 134 | 40 | A | 1 |
| 2016-10-15 | 005 | 50 | D | 3 |
| 2016-10-21 | 096 | 30 | D | 2 |
| 2016-11-28 | 005 | 60 | D | 1 |
| 2016-12-26 | 096 | 80 | D | 1 |

\*A – ascending, D – descending

**Table S2.** Overview of analysed Landsat imagery for glacier area mapping

| Date                                           | Path | row |
|------------------------------------------------|------|-----|
| <b>Subregion: R1 northern wet outer tropic</b> |      |     |
| 2000-09-09                                     | 6    | 68  |
| 2000-09-09                                     | 6    | 69  |
| 2000-08-15                                     | 7    | 67  |
| 2000-08-15                                     | 7    | 68  |
| 2000-07-21                                     | 8    | 66  |
| 2000-07-21                                     | 8    | 77  |
| 2013-06-16                                     | 7    | 67  |
| 2013-06-16                                     | 7    | 68  |
| 2013-07-09                                     | 8    | 66  |
| 2013-07-09                                     | 8    | 67  |
| 2013-07-11                                     | 6    | 68  |
| 2013-07-11                                     | 6    | 69  |
| 2013-08-19                                     | 7    | 67  |
| 2014-07-12                                     | 8    | 66  |
| 2014-07-12                                     | 8    | 67  |
| 2014-07-14                                     | 6    | 68  |
| 2014-08-22                                     | 7    | 67  |
| 2014-11-19                                     | 6    | 69  |
| 2014-11-26                                     | 7    | 68  |
| 2016-01-16                                     | 7    | 68  |
| 2016-01-16                                     | 7    | 69  |
| 2016-06-15                                     | 8    | 66  |
| 2016-06-15                                     | 8    | 67  |
| 2016-06-17                                     | 6    | 68  |
| 2016-07-10                                     | 7    | 67  |
| <b>Subregion: R2 southern wet outer tropic</b> |      |     |
| 2000-06-23                                     | 4    | 69  |
| 2000-07-18                                     | 3    | 69  |
| 2000-07-18                                     | 3    | 70  |
| 2000-08-17                                     | 5    | 69  |
| 2000-08-28                                     | 2    | 70  |
| 2013-06-27                                     | 4    | 69  |
| 2013-06-29                                     | 2    | 70  |
| 2013-07-22                                     | 3    | 70  |
| 2014-06-05                                     | 5    | 69  |
| 2016-07-21                                     | 4    | 69  |
| 2016-07-23                                     | 2    | 70  |
| 2016-07-30                                     | 3    | 70  |
| 2016-08-29                                     | 5    | 69  |
| <b>Subregion: R3 dry outer tropics</b>         |      |     |
| 2000-07-25                                     | 4    | 70  |
| 2000-07-16                                     | 5    | 70  |
| 2000-08-03                                     | 3    | 71  |
| 2000-09-11                                     | 4    | 71  |
| 2000-09-13                                     | 2    | 71  |
| 2013-09-06                                     | 5    | 70  |
| 2013-09-08                                     | 3    | 71  |
| 2013-09-01                                     | 2    | 71  |
| 2013-09-15                                     | 4    | 70  |
| 2013-10-17                                     | 4    | 71  |
| 2016-05-11                                     | 3    | 71  |
| 2016-05-20                                     | 2    | 71  |
| 2016-07-28                                     | 5    | 70  |
| 2016-07-21                                     | 4    | 70  |
| 2016-07-21                                     | 4    | 71  |



**Table S3:** Snow line altitude (SLA) and equilibrium line altitude (ELA) reported for the study region and period. (RS: remote sensing, GL: glaciological method, AA: Area-Altitude method,  $H_{\text{mean}}$ : mean glacier elevation). Bold values indicate used average ELA for penetration depth bias estimation.

| period               | min<br>(m a.s.l.) | max<br>(m a.s.l.) | Type | Method            | Source                     |
|----------------------|-------------------|-------------------|------|-------------------|----------------------------|
| <b>Subregion R1</b>  |                   |                   |      |                   |                            |
| 2000-2015            | 4845              | 5085              | SLA  | RS                | Veettil et al., 2017a      |
| 2000-2015            | 4720              | 4920              | SLA  | RS                | Veettil et al., 2017b      |
| 1999-2005            | 5034              | 5086              | SLA  | RS                | McFadden et al., 2011      |
| 2006-2010            | 4835              | 5075              | SLA  | RS                | Lopez-Moreno et al., 2014  |
| 2006-2008            | 4953              | 4985              | ELA  | GL                | Gurgiser et al., 2013      |
| 2004-2015            | 4959              | 5071              | ELA  | GL                | Artesonraju Glacier, WGMS  |
| 2004-2015            | 4868              | 4942              | ELA  | GL                | Yanamarey Glacier, WGMS    |
| <b>average: 4955</b> |                   |                   |      |                   |                            |
| <b>Subregion R2</b>  |                   |                   |      |                   |                            |
| 2000-2015            | 4680              | 5120              | SLA  | RS                | Veettil et al., 2017b      |
| 1998-2009            | 5526              | 5414              | SLA  | RS                | Hanshaw and Bookagen, 2014 |
| 1998-2016            | 5050              | 5414              | ELA  | $H_{\text{mean}}$ | Drenkhan et al. 2018       |
| <b>average: 5199</b> |                   |                   |      |                   |                            |
| <b>Subregion R3</b>  |                   |                   |      |                   |                            |
| 2000-2014            | 5480              | 5745              | SLA  | RS                | Veettil et al., 2016       |
| 2007                 |                   | 5910              | ELA  | AA                | Ubeda, 2011                |
| <b>average: 5711</b> |                   |                   |      |                   |                            |

## References:

- Gurgiser, W., Marzeion, B., Nicholson, L., Ortner, M., Kaser, G., 2013. Modeling energy and mass balance of Shallap Glacier, Peru. *The Cryosphere* 7, 1787–1802. <https://doi.org/10.5194/tc-7-1787-2013>
- Hanshaw, M.N., Bookhagen, B., 2014. Glacial areas, lake areas, and snow lines from 1975 to 2012: status of the Cordillera Vilcanota, including the Quelccaya Ice Cap, northern central Andes, Peru. *The Cryosphere* 8, 359–376. <https://doi.org/10.5194/tc-8-359-2014>
- López-Moreno, J.I., Fontaneda, S., Bazo, J., Revuelto, J., Azorin-Molina, C., Valero-Garcés, B., Morán-Tejeda, E., Vicente-Serrano, S.M., Zubieta, R., Alejo-Cochachín, J., 2014. Recent glacier retreat and climate trends in Cordillera Huaytapallana, Peru. *Glob. Planet. Change* 112, 1–11. <https://doi.org/10.1016/j.gloplacha.2013.10.010>
- McFadden, E.M., Ramage, J., Rodbell, D.T., 2011. Landsat TM and ETM+ derived snowline altitudes in the Cordillera Huayhuash and Cordillera Raura, Peru, 1986–2005. *The Cryosphere* 5, 419–430. <https://doi.org/10.5194/tc-5-419-2011>
- Ubeda, J., 2011. El impacto del cambio climático en los glaciares del complejo volcánico Nevado Coropuna, (Cordillera Occidental de los Andes Centrales) (info:eu-repo/semantics/doctoralThesis). Universidad Complutense de Madrid, Servicio de Publicaciones, Madrid.
- Veettil, B.K., Bremer, U.F., Souza, S.F. de, Maier, É.L.B., Simões, J.C., 2016. Variations in annual snowline and area of an ice-covered stratovolcano in the Cordillera Ampato, Peru, using remote sensing data (1986–2014). *Geocarto Int.* 31, 544–556. <https://doi.org/10.1080/10106049.2015.1059902>
- Veettil, B.K., Wang, S., Bremer, U.F., de Souza, S.F., Simões, J.C., 2017a. Recent trends in annual snowline variations in the northern wet outer tropics: case studies from southern Cordillera Blanca, Peru. *Theor. Appl. Climatol.* 129, 213–227. <https://doi.org/10.1007/s00704-016-1775-0>
- Veettil, B.K., Wang, S., Simões, J.C., Ruiz Pereira, S.F., de Souza, S.F., 2017b. Regional climate forcing and topographic influence on glacier shrinkage: eastern cordilleras of Peru. *Int. J. Climatol.* 38, 979–995. <https://doi.org/10.1002/joc.5226>
